# Supplementary material
Source: PubMed Central journal article supplement (PMC3102642)

## *Supporting Information*

### **Trifluoroacetic Anhydride–Catalyzed Oxidation of Isonitriles by DMSO: A Rapid, Convenient Synthesis of Isocyanates**

Hoang V. Le and Bruce Ganem\*

*Department of Chemistry and Chemical Biology*

*Baker Laboratory, Cornell University*

*Ithaca, NY 14853-1301*

#### **General Procedures:**

<sup>1</sup>H NMR spectra were taken on a Varian Inova-400 spectrometer using CDCl<sub>3</sub> with 0.05% v/v TMS or DMSO-d<sub>6</sub> as solvents, recorded in δ (ppm), and referenced to TMS (0.00 ppm) or DMSO-d<sub>6</sub> (2.50 ppm). <sup>13</sup>C NMR spectra were taken on a Varian Inova-400 spectrometer using CDCl<sub>3</sub> with 0.05% v/v TMS as solvent, recorded in δ (ppm), and referenced to CDCl<sub>3</sub> (77.16 ppm for <sup>13</sup>C NMR). IR spectra were obtained using a Thermo Nicolet Avatar 370DTGS FT-IR spectrometer and recorded in wavenumbers (cm<sup>-1</sup>). Melting points were measured using a Thomas Hoover Uni-melt Capillary Melting Point Apparatus. Mass spectra were measured at the Life Sciences Core Laboratories Center using ABI/MDS Sciex 4000 Q Trap. Chemicals were obtained from Aldrich, Acros, Aensar, or Fluka and used as received unless specified.

#### ***Reduction of Dibenzyl Sulfoxide to Dibenzylsulfide [538-74-9]***

Dibenzyl sulfoxide (115 mg, 0.5 mmol, recrystallized from ethanol) was dissolved in dry CH<sub>2</sub>Cl<sub>2</sub> (0.5 mL) and *t*-butyl isonitrile (74 μL, 0.65 mmol) under N<sub>2</sub> in a 25 mL RBF. After cooling the solution to 0 °C, TFAA (91 μL, 0.65 mmol) was added dropwise. The resulting solution was stirred vigorously at 0 °C for 5 min, then warmed to rt and stirred for 5 min. The solution was then concentrated *in vacuo* to afford a white paste, which was purified by flash column chromatography (1:15 ethyl acetate:hexane, R<sub>f</sub>=0.35) to afford the desired sulfide (94 mg, 88%) as a white solid.

#### ***Representative Procedure for the Catalytic Oxidation of Isonitriles to Isocyanates: Oxidation***

***of *t*-Butyl Isonitrile and Trapping with *t*-Butylamine.***

A solution of *t*-butyl isonitrile (113  $\mu\text{L}$ , 1 mmol) in dry  $\text{CH}_2\text{Cl}_2$  (1 mL) and dry DMSO (78  $\mu\text{L}$ , 1.1 mmol) under  $\text{N}_2$  in a 25 mL RBF was cooled to  $-60\text{ }^\circ\text{C}$ , then TFAA (7  $\mu\text{L}$ , 0.05 mmol) was added. The resulting solution was stirred vigorously at  $-60\text{ }^\circ\text{C}$  for 5 min, then warmed to rt and stirred for 5 min. After recooling the solution to  $-60\text{ }^\circ\text{C}$ , *t*-butylamine (315  $\mu\text{L}$ , 3 mmol) was added dropwise. The resulting solution was stirred at rt for 2 h, then concentrated *in vacuo* to afford a white solid. Water (3 mL) was added and the aqueous phase was extracted with ethyl acetate (4 x 5 mL). The combined organic extracts were washed with brine (2 mL), dried ( $\text{MgSO}_4$ ), filtered and concentrated *in vacuo* to afford di-*t*-butylurea (165 mg, 96%) as a white solid, m.p.  $252 - 254\text{ }^\circ\text{C}$  (sealed capillary tube) (lit.<sup>1</sup>  $240\text{ }^\circ\text{C}$ ).

***N-n-butyl-N'-tert-butylurea [25347-96-0]***

Yield: 95%, m.p.  $73-76\text{ }^\circ\text{C}$  (lit.<sup>2</sup>  $71-72\text{ }^\circ\text{C}$ ).

***N-tert-butyl-N'-4-methoxyphenylurea***

Yield: 61%, m.p. =  $129 - 130.5\text{ }^\circ\text{C}$  (lit.<sup>3</sup>  $128 - 130\text{ }^\circ\text{C}$ ).

***N-tert-butyl-N'-2-morpholinoethylurea***

Yield: 67%. IR (neat) 3350(s), 2961(s), 2926(m), 2856(m), 2811(m), 1638(s), 1558(s).  
ESI-MS ( $\text{CH}_3\text{OH}$ ) 230 (M+H).

***Representative Procedure for the Catalytic Oxidation of Isonitriles with Direct Isolation of the***

***Isocyanate: Ethyl Isocyanatoacetate [2949-22-6]***

A solution of ethyl isocyanatoacetate (115  $\mu\text{L}$ , 1 mmol) in dry  $\text{CH}_2\text{Cl}_2$  (1 mL) and dry DMSO (78  $\mu\text{L}$ , 1.1 mmol) under  $\text{N}_2$  in a 25 mL RBF was cooled to  $-60\text{ }^\circ\text{C}$ , then TFAA (7  $\mu\text{L}$ , 0.05 mmol) was added. The resulting solution was stirred vigorously at  $-60\text{ }^\circ\text{C}$  for 5 min, then warmed to rt and stirred for 5 min. Solvent was removed using a rotary evaporator and the residue concentrated *in vacuo* (0.2 Torr, 1-2 min) to afford ethyl isocyanatoacetate (122 mg,

95%) as a brown oil whose IR and <sup>1</sup>H NMR matched those in the Aldrich Spectral Library. IR (neat) 3349(m), 2986(m), 2254(s), 1747(s).

***Cyclohexyl isocyanate*** [3173-53-3]

Yield: 94%. IR and <sup>1</sup>H-NMR matched those in the Aldrich Spectral Library. IR (neat) 2937(s), 2858(m), 2263(s).

- 
1. Baumgarter, H. E., Smith, H. L., and Staklis, A. *J. Org. Chem.* **1975**, *40*, 3554.
  2. Linke, S., Tissue, G. T., and Lwowski, W. *J. Am. Chem. Soc.*, **1967**, *89*, 6308.
  3. Groszek, G. *Org. Proc. Res. Dev.*, **2002**, *6*, 759.

S4

7.31  
7.29  
7.28  
7.27  
7.27  
7.25  
7.24  
7.23  
7.22  
7.22  
7.21

3.57

| Parameter          | Value                                                                    |
|--------------------|--------------------------------------------------------------------------|
| 1 Data File Name   | C:/Users/Hoang_2/Documents/Ganem - Research/Pummerer/HVL-II-269a.fid/fid |
| 2 Solvent          | cdd3                                                                     |
| 3 Acquisition Date | 2011-01-24T14:21:33                                                      |
| 4 Temperature      | 25.0                                                                     |
| 5 Nucleus          | <sup>1</sup> H                                                           |

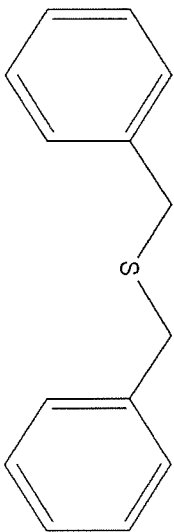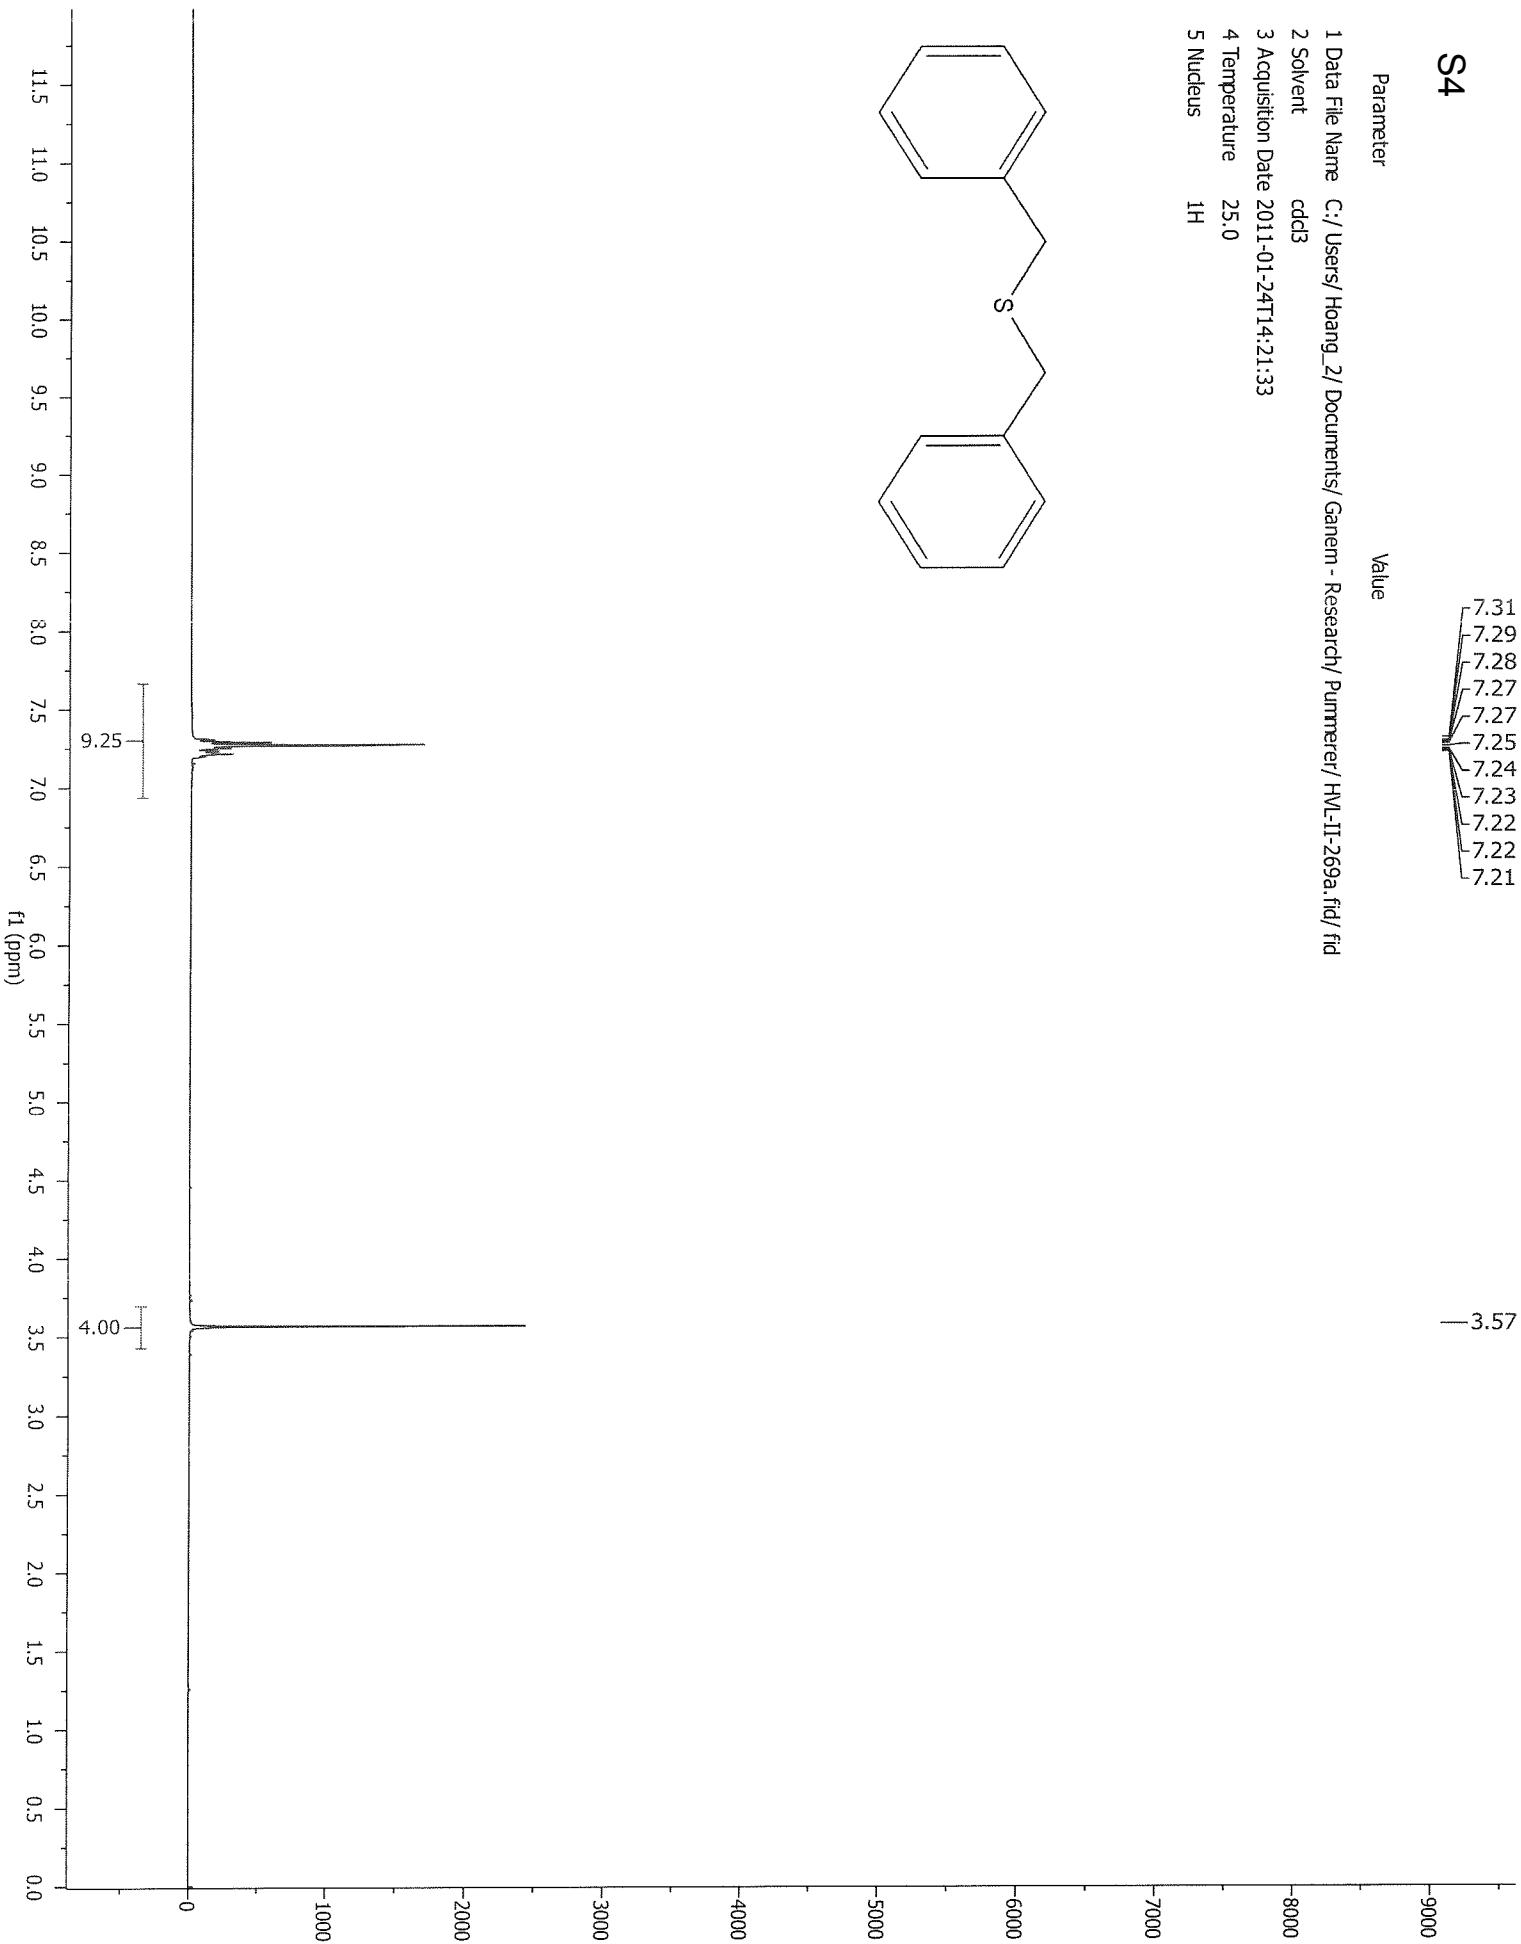

# S5

| Parameter          | Value                                                                   |
|--------------------|-------------------------------------------------------------------------|
| 1 Data File Name   | C:/Users/Hoang/Documents/Ganem - Research/Pummeref/HVL-III-33a.fid/ fid |
| 2 Solvent          | dms0                                                                    |
| 3 Temperature      | 21.0                                                                    |
| 4 Acquisition Date | 2011-02-11T13:41:21                                                     |
| 5 Nucleus          | <sup>1</sup> H                                                          |

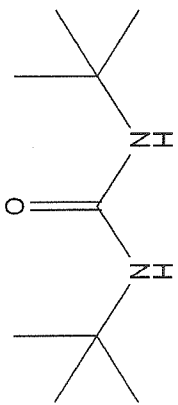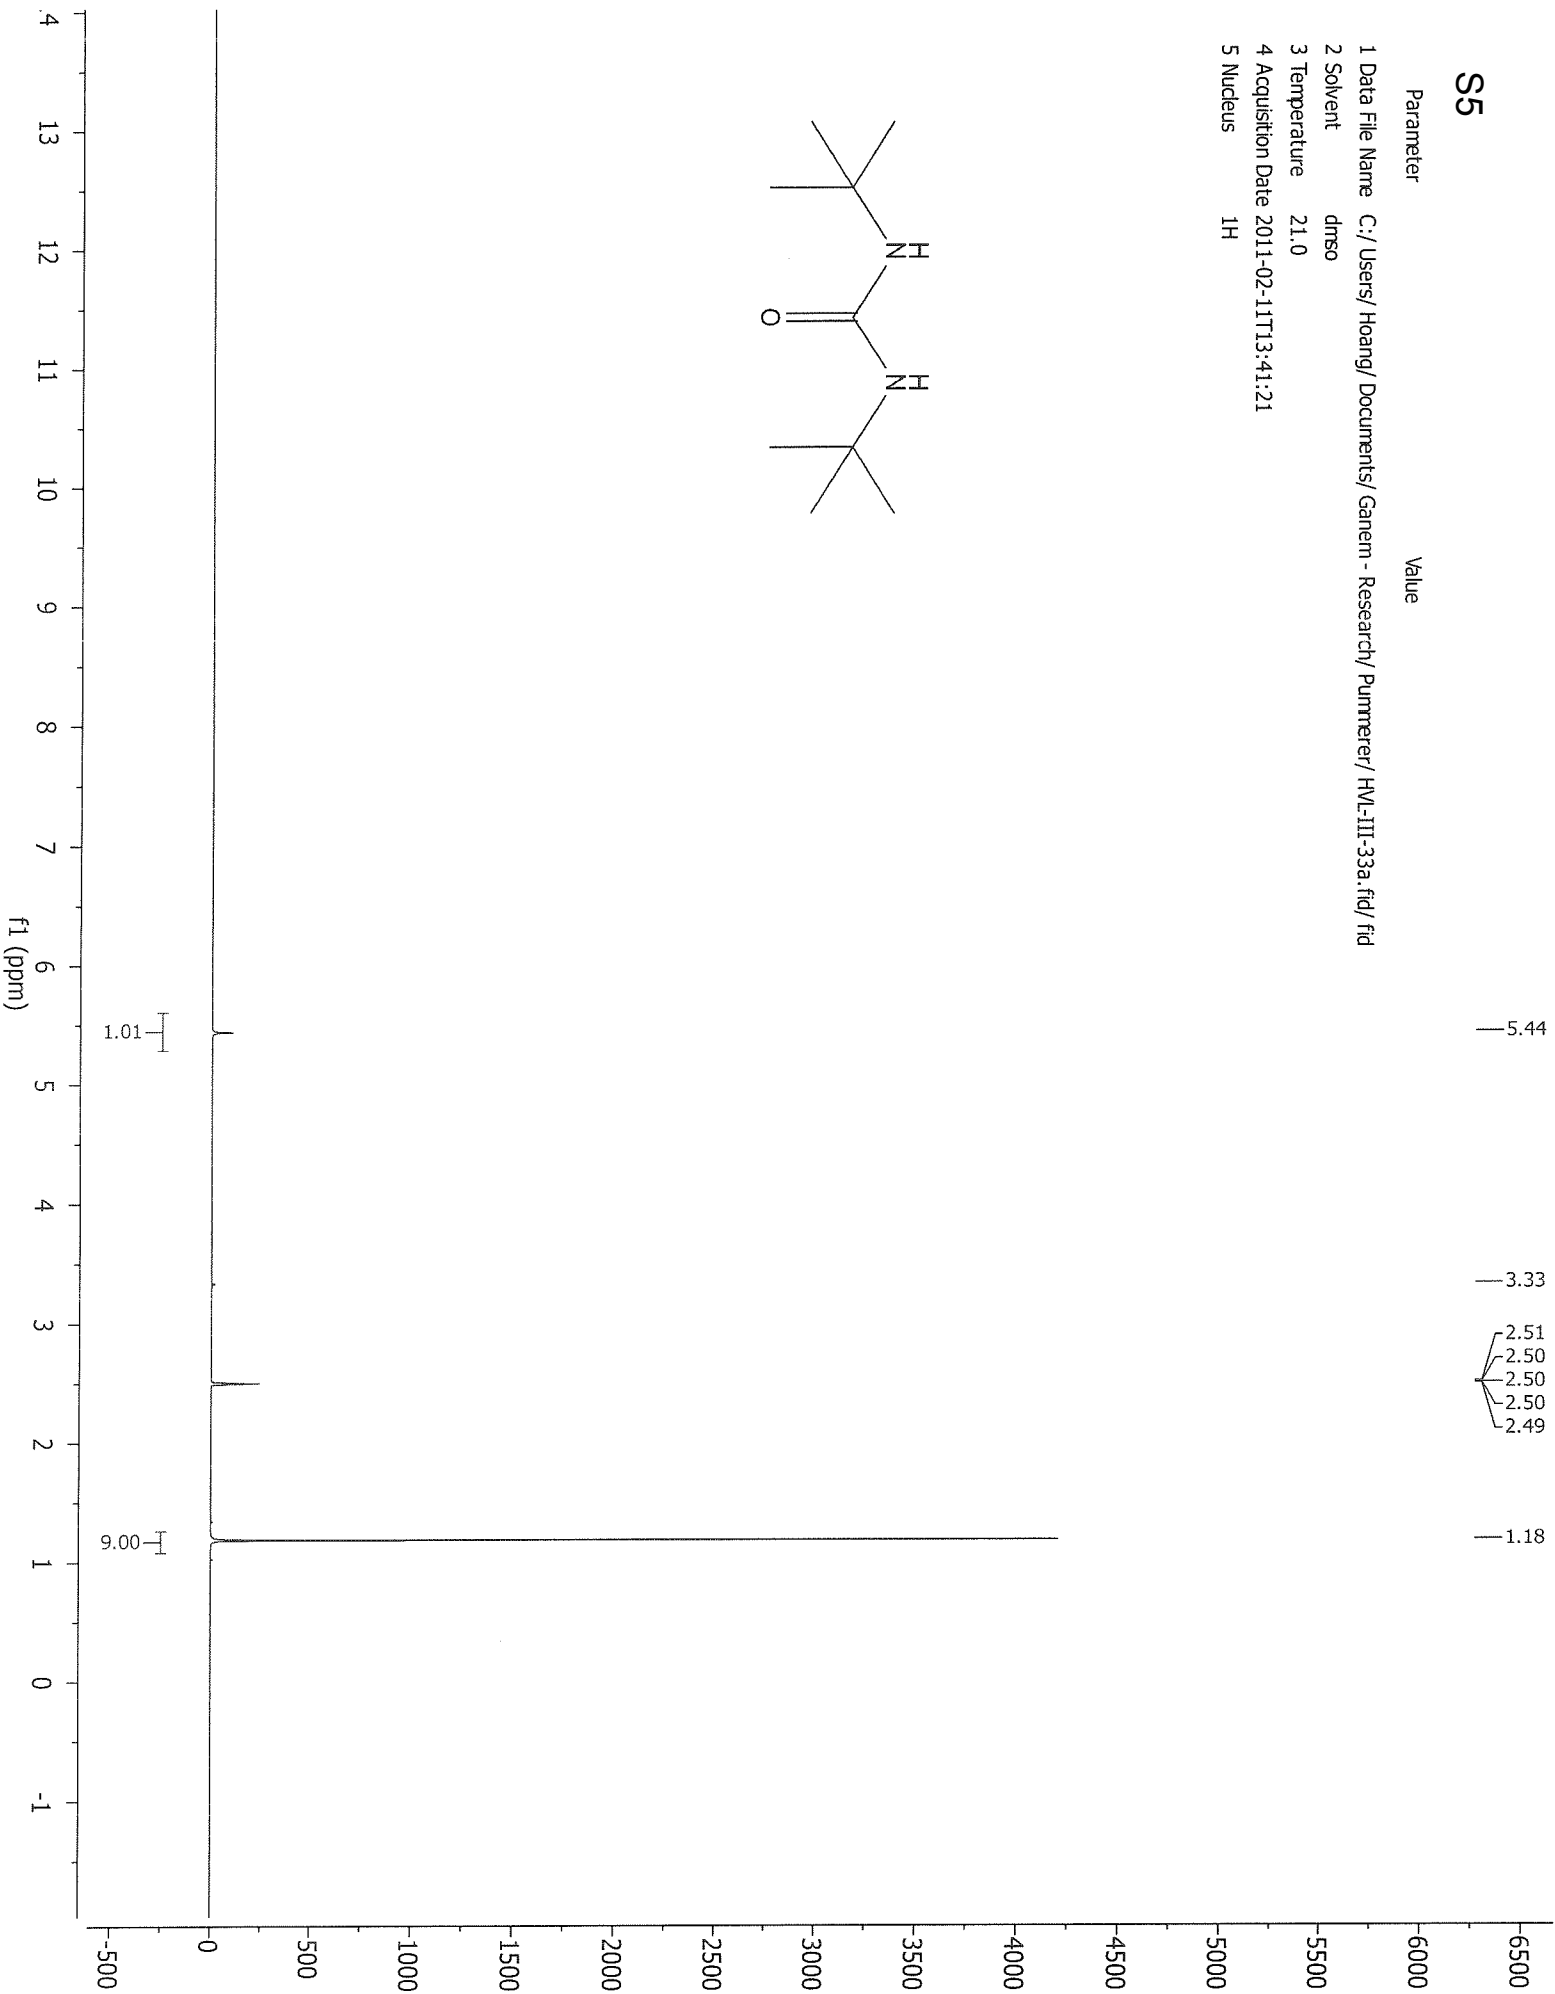

Parameter Value  
 1 Data File Name C:/Users/Hoang/Documents/Ganem - Research/Purmerer/HVL-III-40a.fid/ fid  
 2 Solvent cdc3  
 3 Temperature 21.0  
 4 Acquisition Date 2011-02-14T16:34:12  
 5 Nucleus 1H

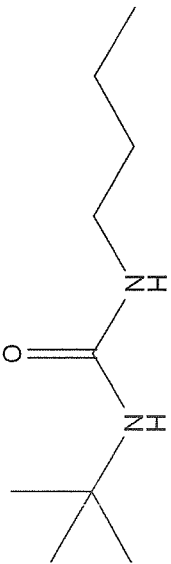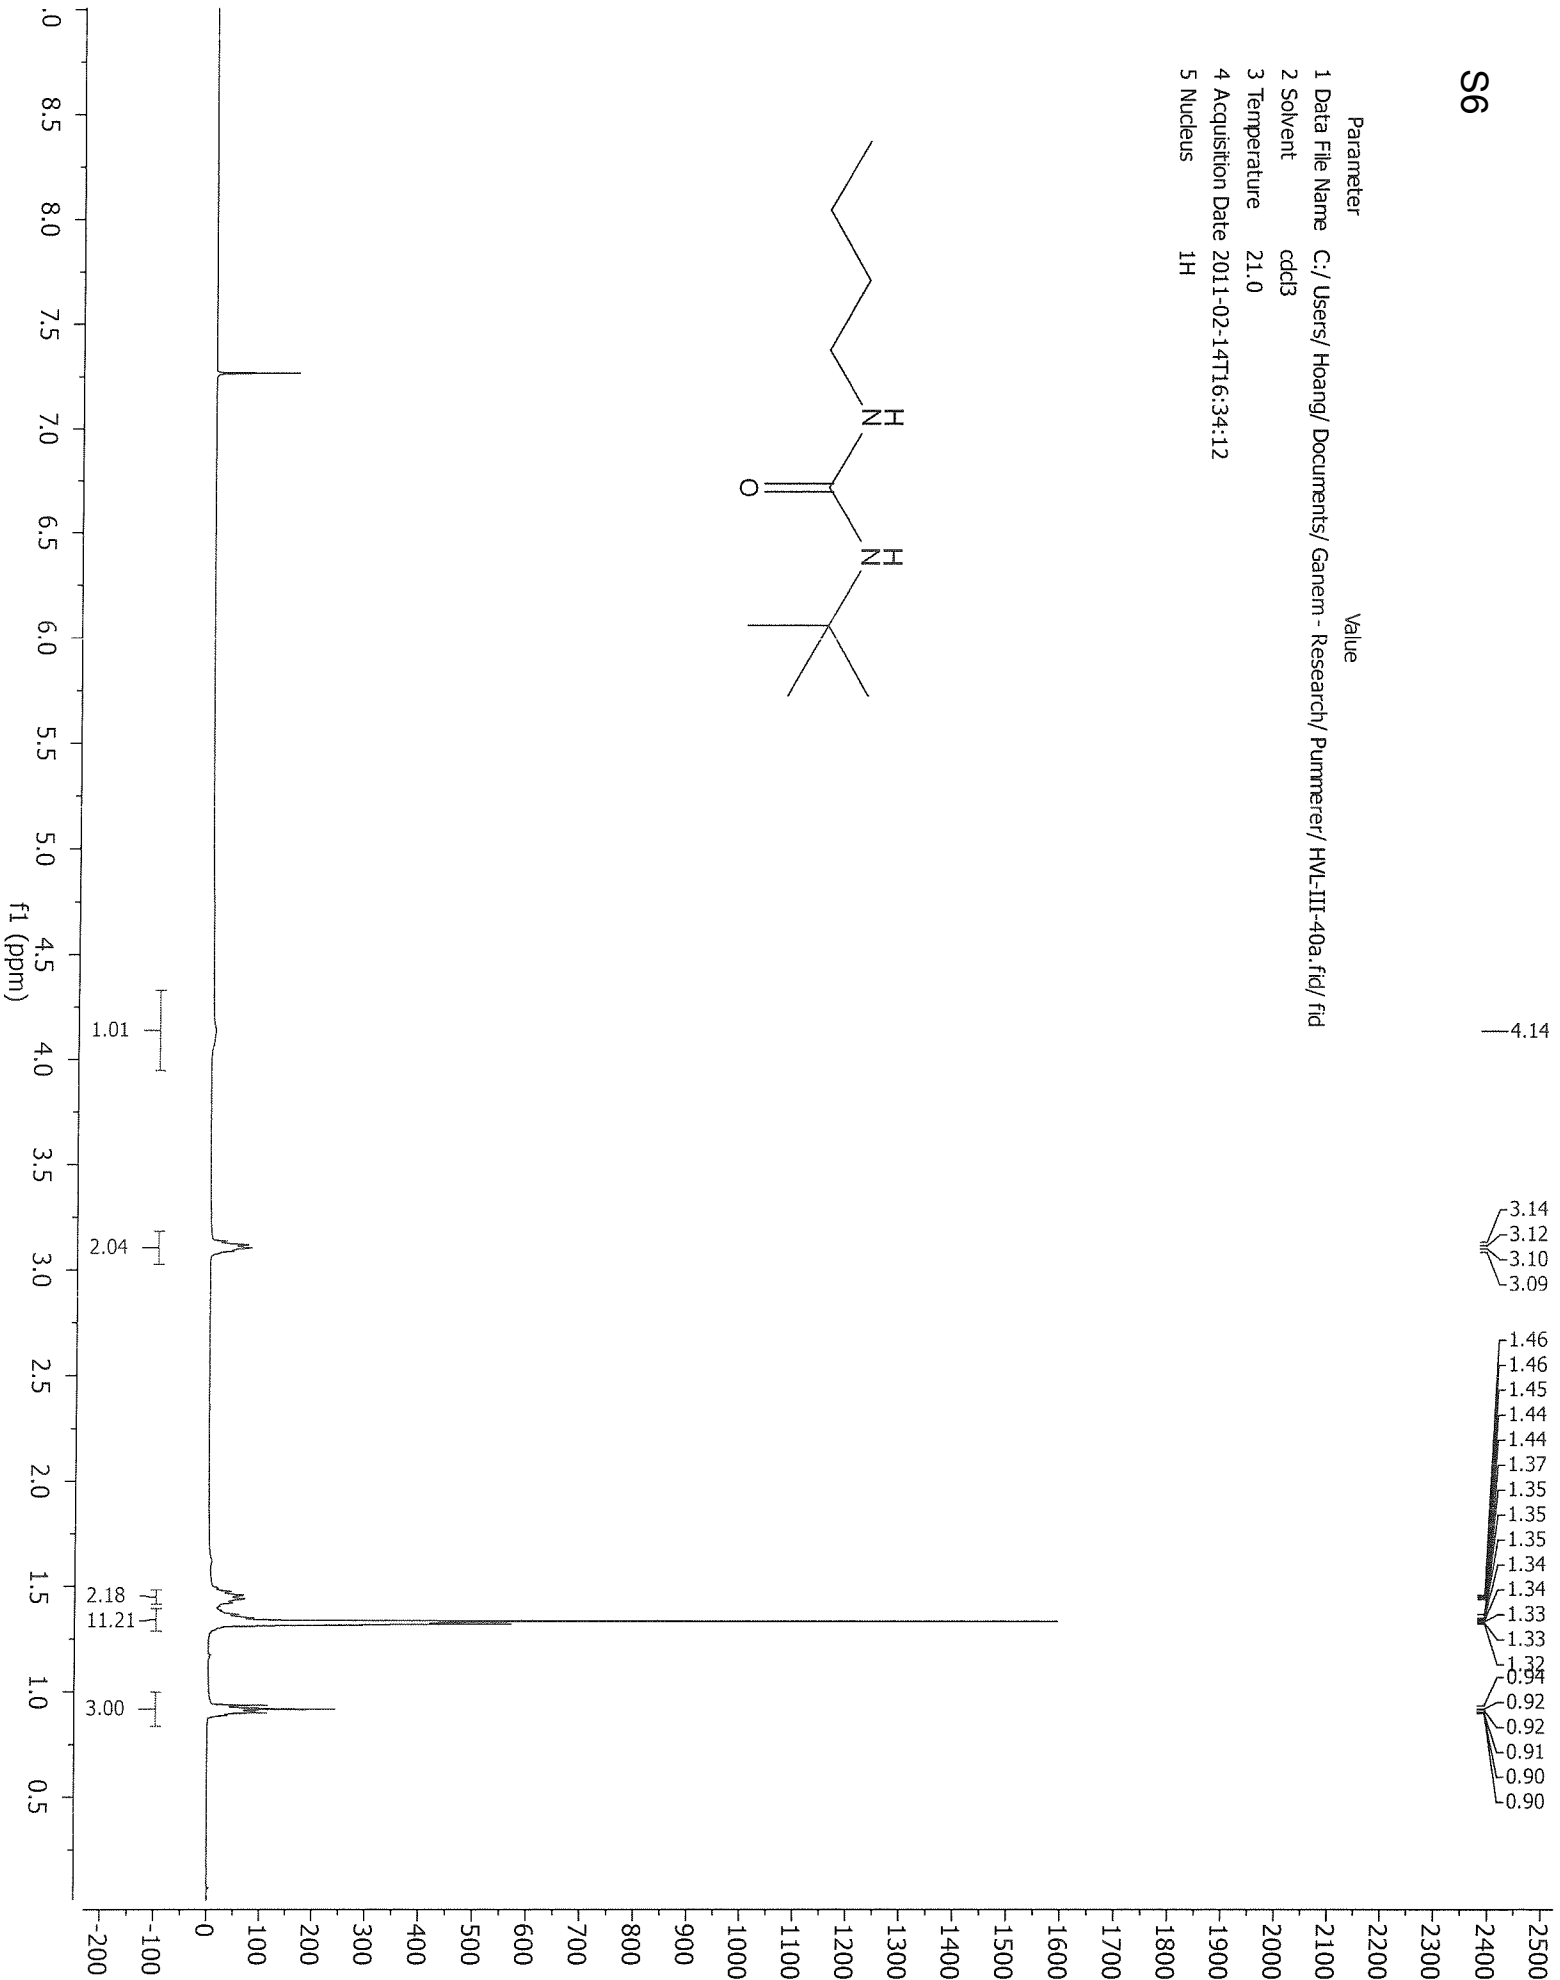

S7

Parameter Value  
1 Data File Name C:/Users/Hoang/Documents/Ganem - Research/Pumrerer/HVL-III-50a.fid/ fid  
2 Solvent cdc13  
3 Temperature 21.0  
4 Acquisition Date 2011-02-22T18:29:25  
5 Nucleus 1H

7.17  
7.15  
6.86  
6.84

6.08

4.58

3.79

1.34

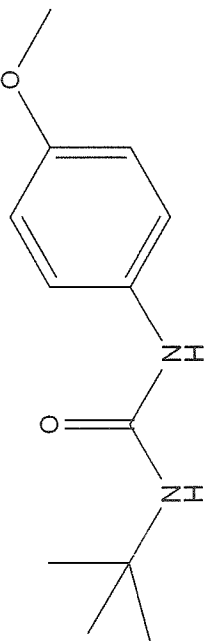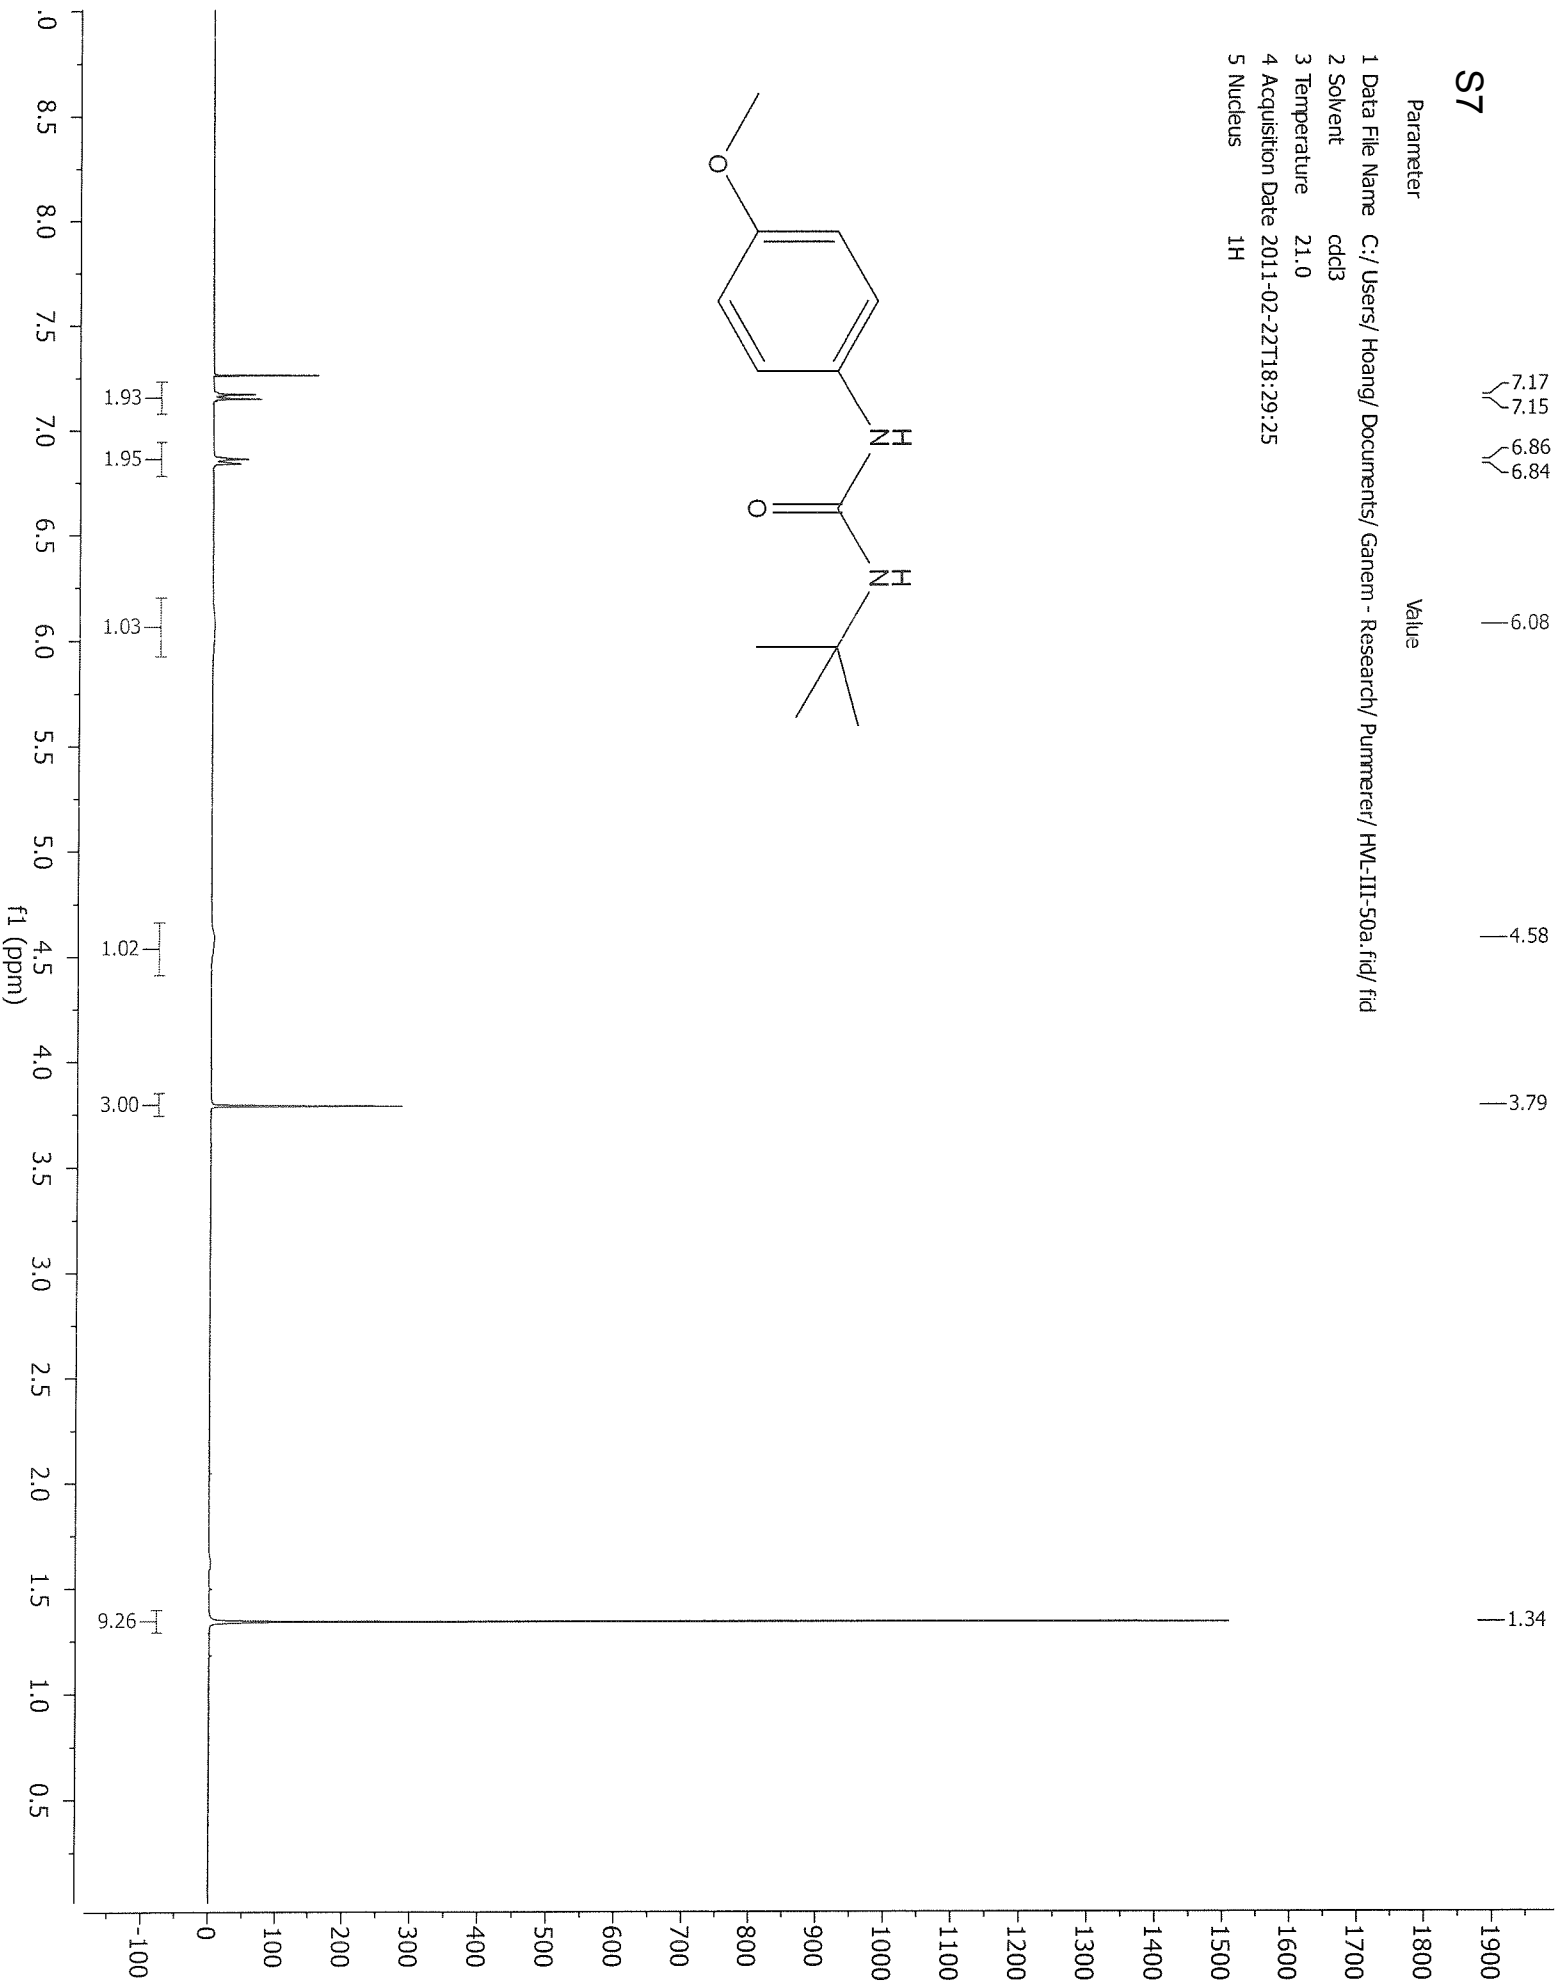

156.76  
155.75

131.21

124.49

114.55

55.48

50.71

29.32

| Parameter          | Value                                                                       |
|--------------------|-----------------------------------------------------------------------------|
| 1 Data File Name   | C:/Users/Hoang/Documents/Ganem - Research/Pumrerer/HVL-III-50a-C13.fid/ fid |
| 2 Solvent          | cdcl3                                                                       |
| 3 Temperature      | 21.0                                                                        |
| 4 Acquisition Date | 2011-03-14T15:25:05                                                         |
| 5 Nucleus          | 13C                                                                         |

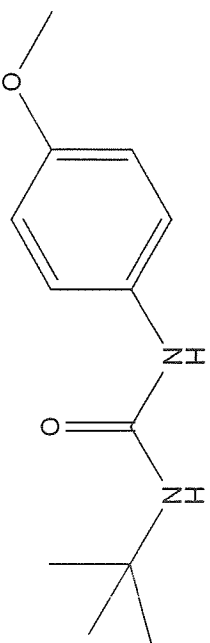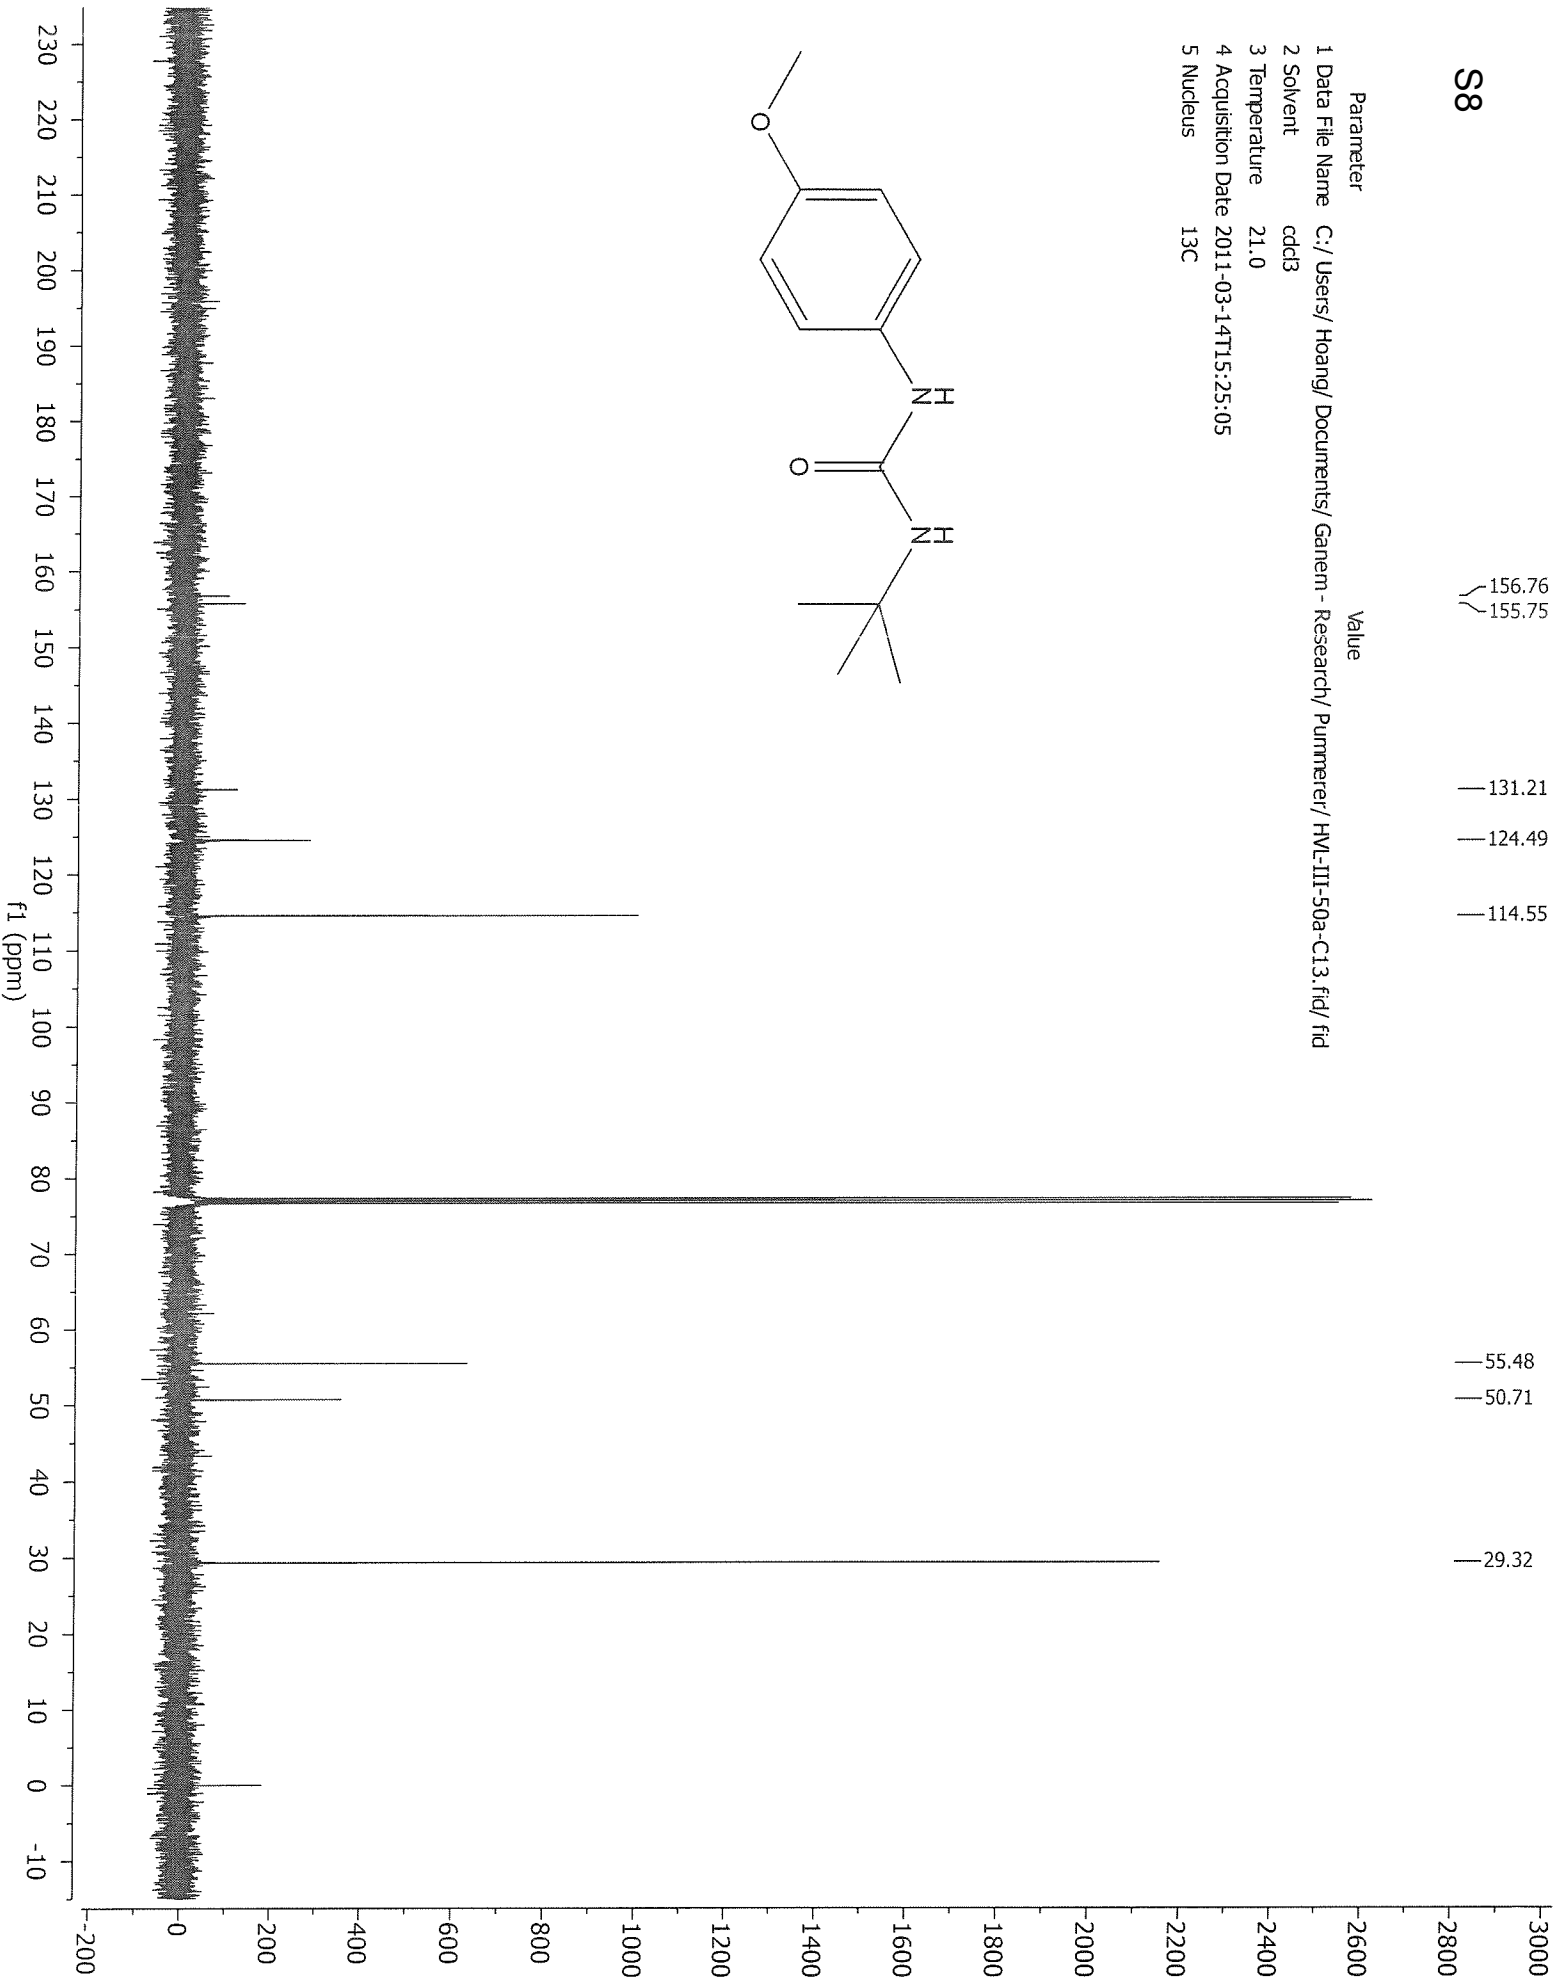



# S9

| Parameter          | Value                                                                  |
|--------------------|------------------------------------------------------------------------|
| 1 Data File Name   | C:/Users/Hoang/Documents/Ganem - Research/Pumrerer/HVL-III-57b.fid/fid |
| 2 Solvent          | cdd3                                                                   |
| 3 Temperature      | 21.0                                                                   |
| 4 Acquisition Date | 2011-02-28T10:21:55                                                    |
| 5 Nucleus          | <sup>1</sup> H                                                         |

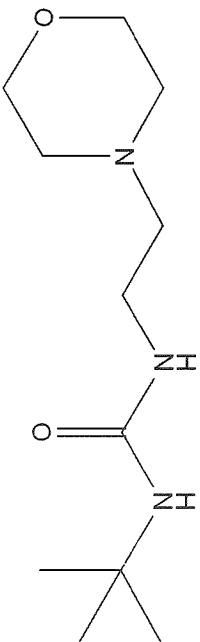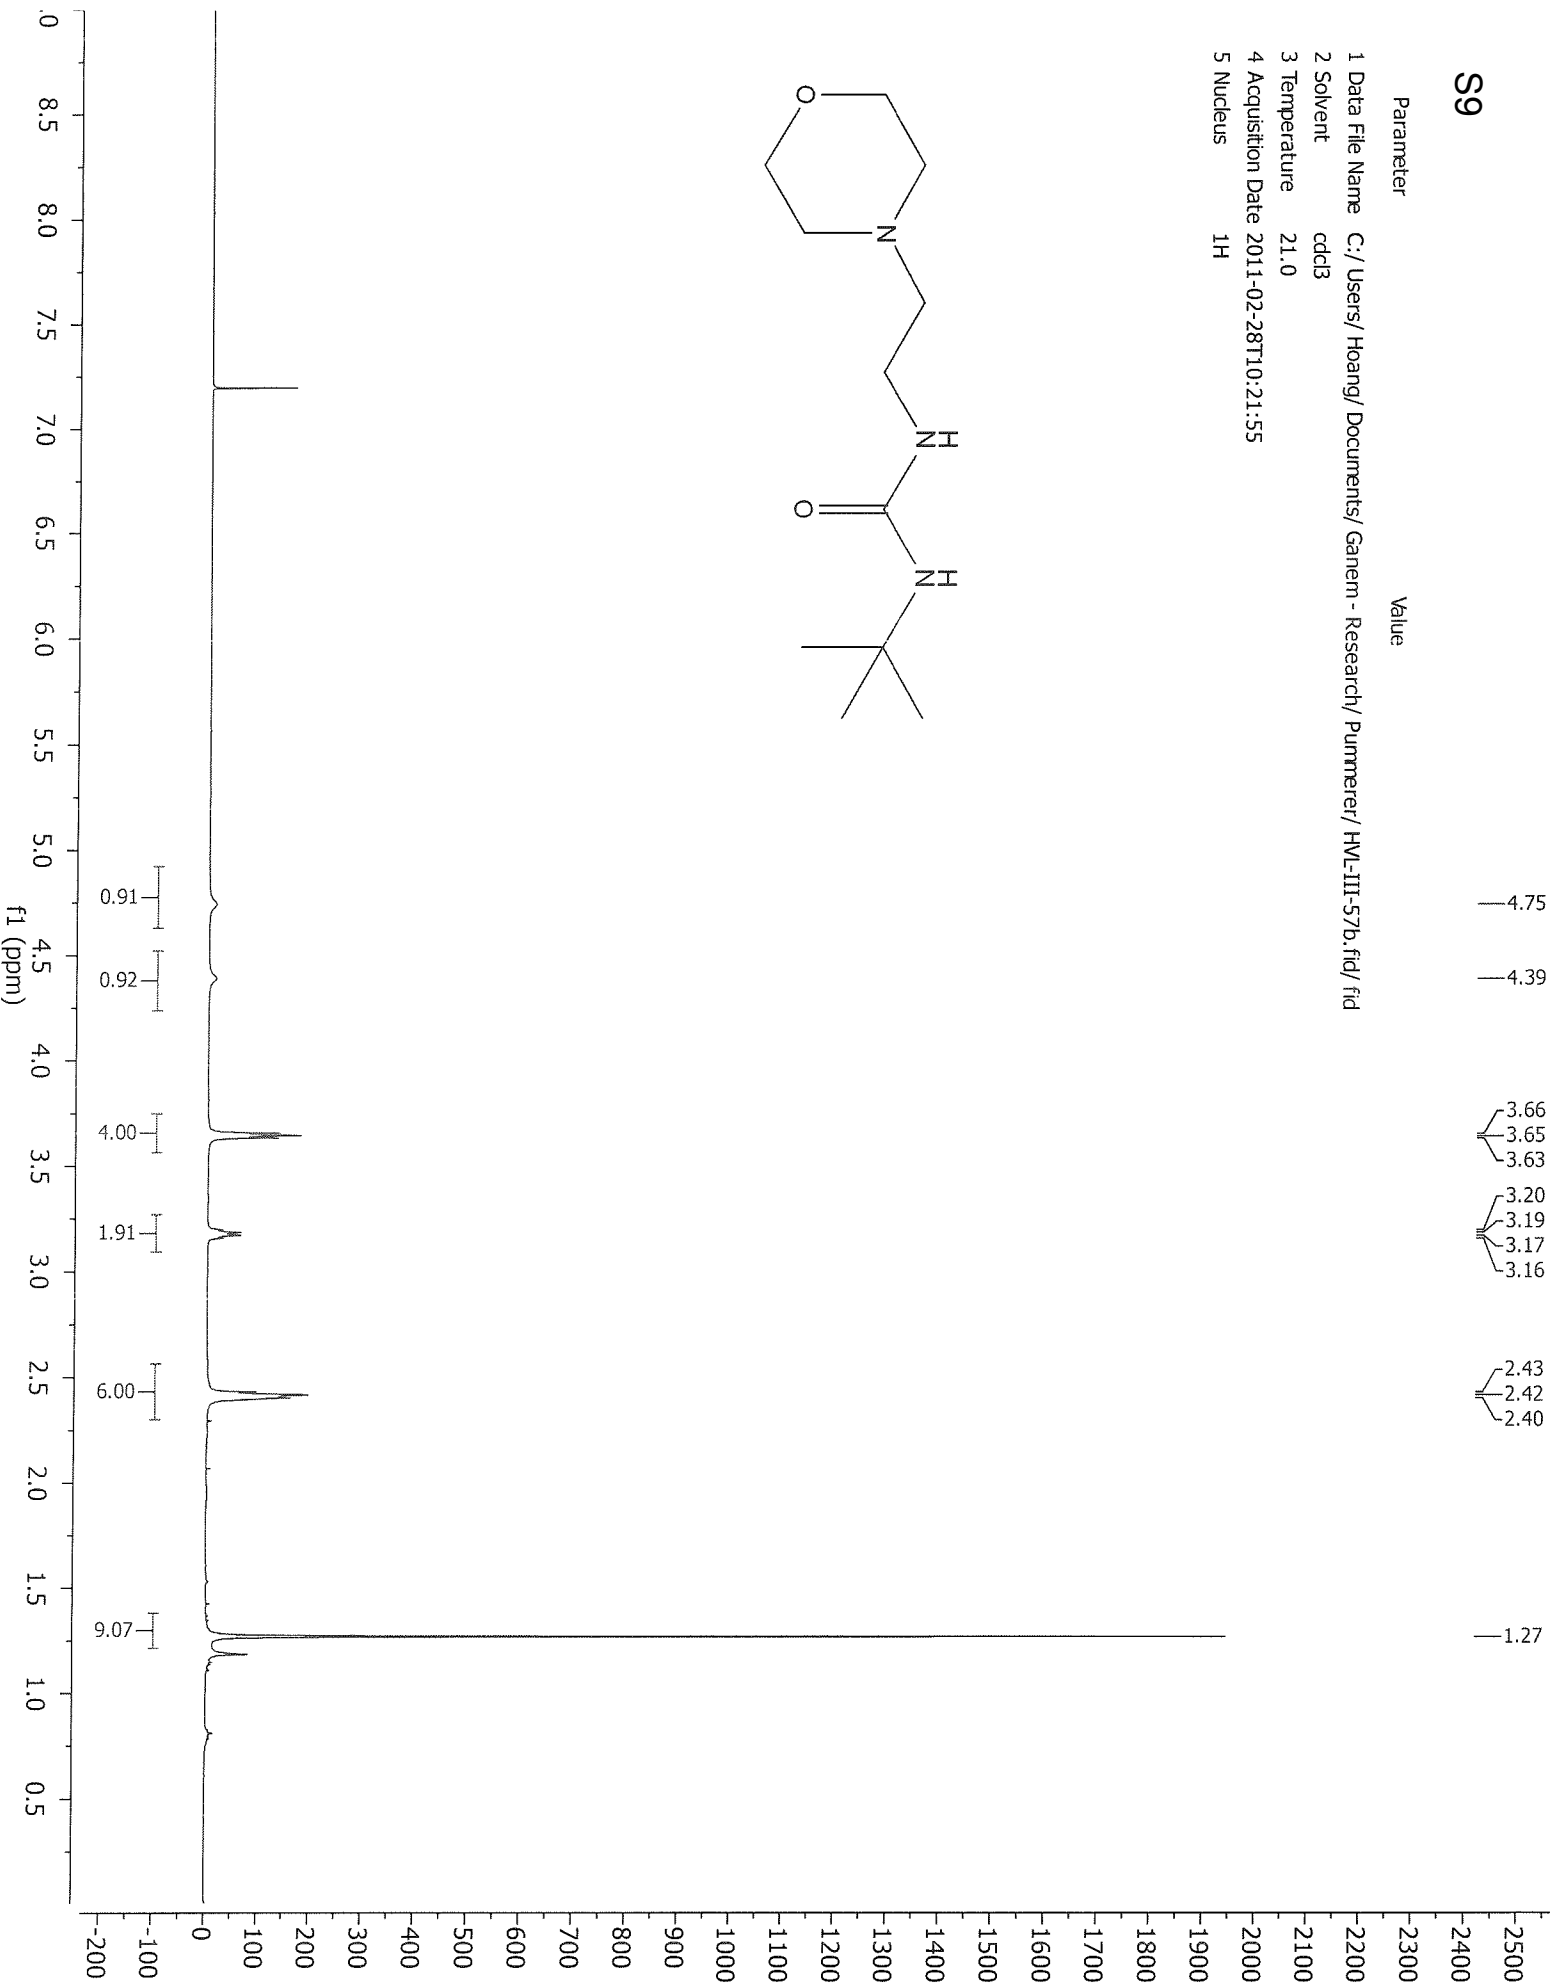

# S10

Parameter

Value

- 1 Data File Name C:/Users/Hoang/Documents/Ganem - Research/Pummeier/HML-III-57b-C13.fid/ fid
- 2 Solvent cdcl3
- 3 Temperature 21.0
- 4 Acquisition Date 2011-02-28T11:28:17
- 5 Nucleus <sup>13</sup>C

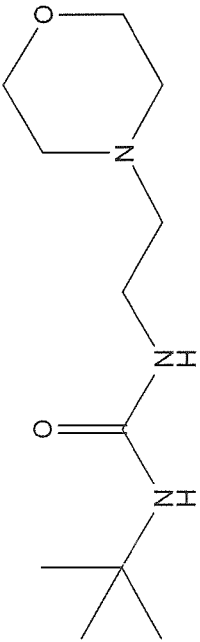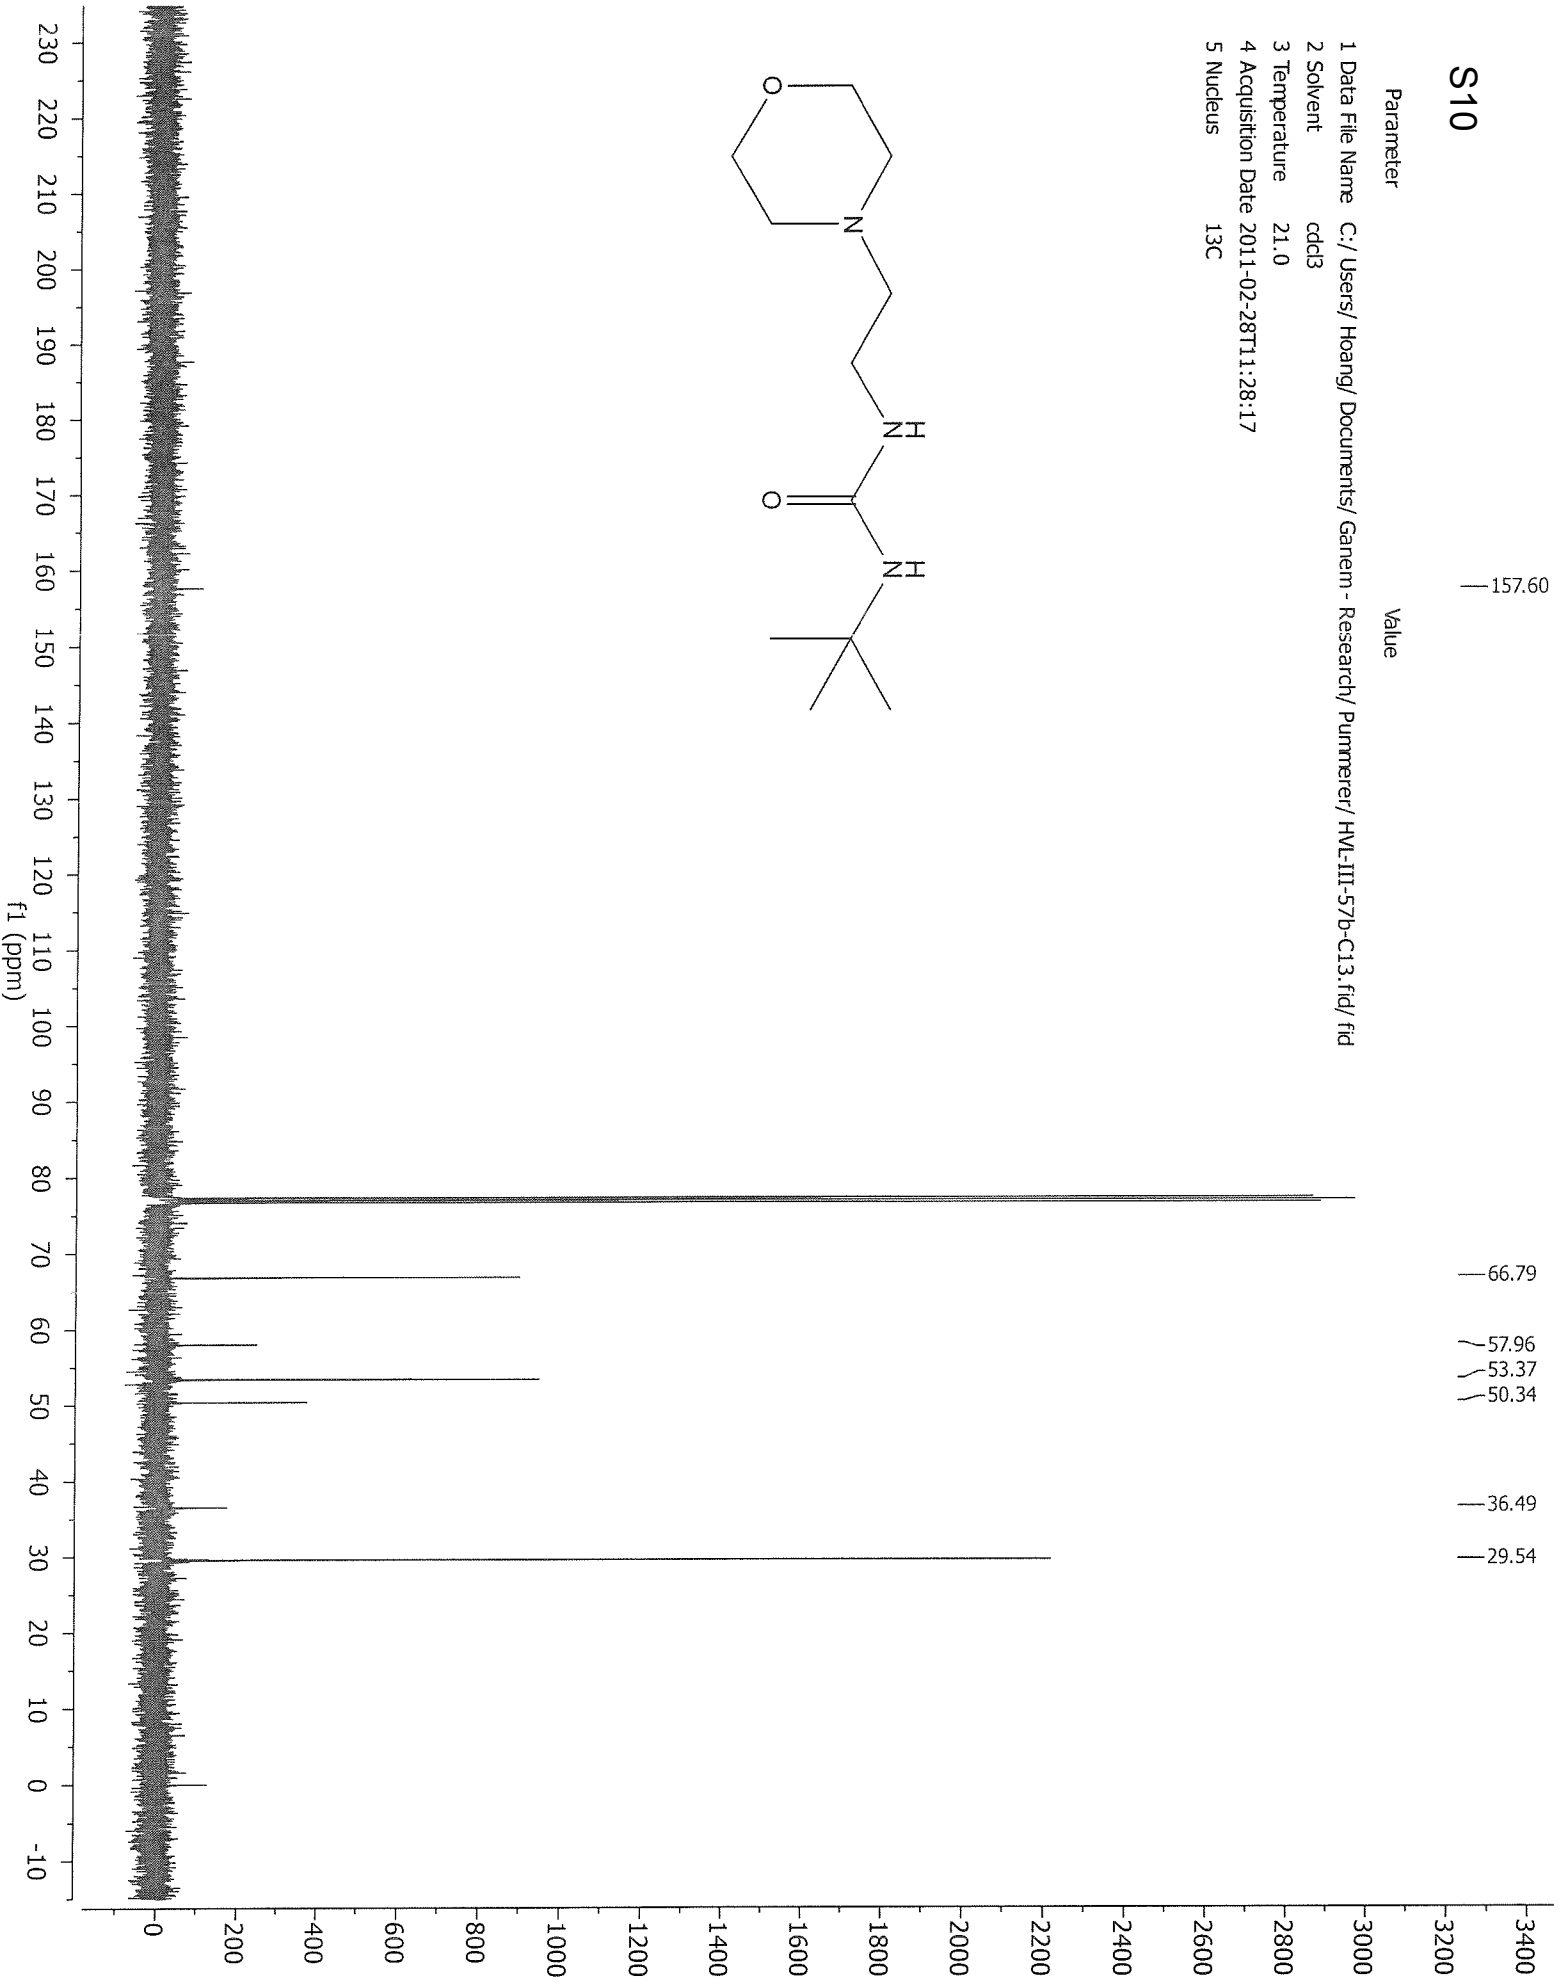

# S11

| Parameter          | Value                                                                  |
|--------------------|------------------------------------------------------------------------|
| 1 Data File Name   | C:/Users/Hoang/Documents/Ganem - Research/Pumnerer/HVL-III-75b.fid/fid |
| 2 Solvent          | cdcl3                                                                  |
| 3 Temperature      | 21.0                                                                   |
| 4 Acquisition Date | 2011-03-11T18:36:57                                                    |
| 5 Nucleus          | 1H                                                                     |

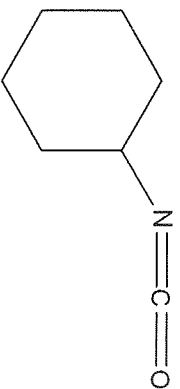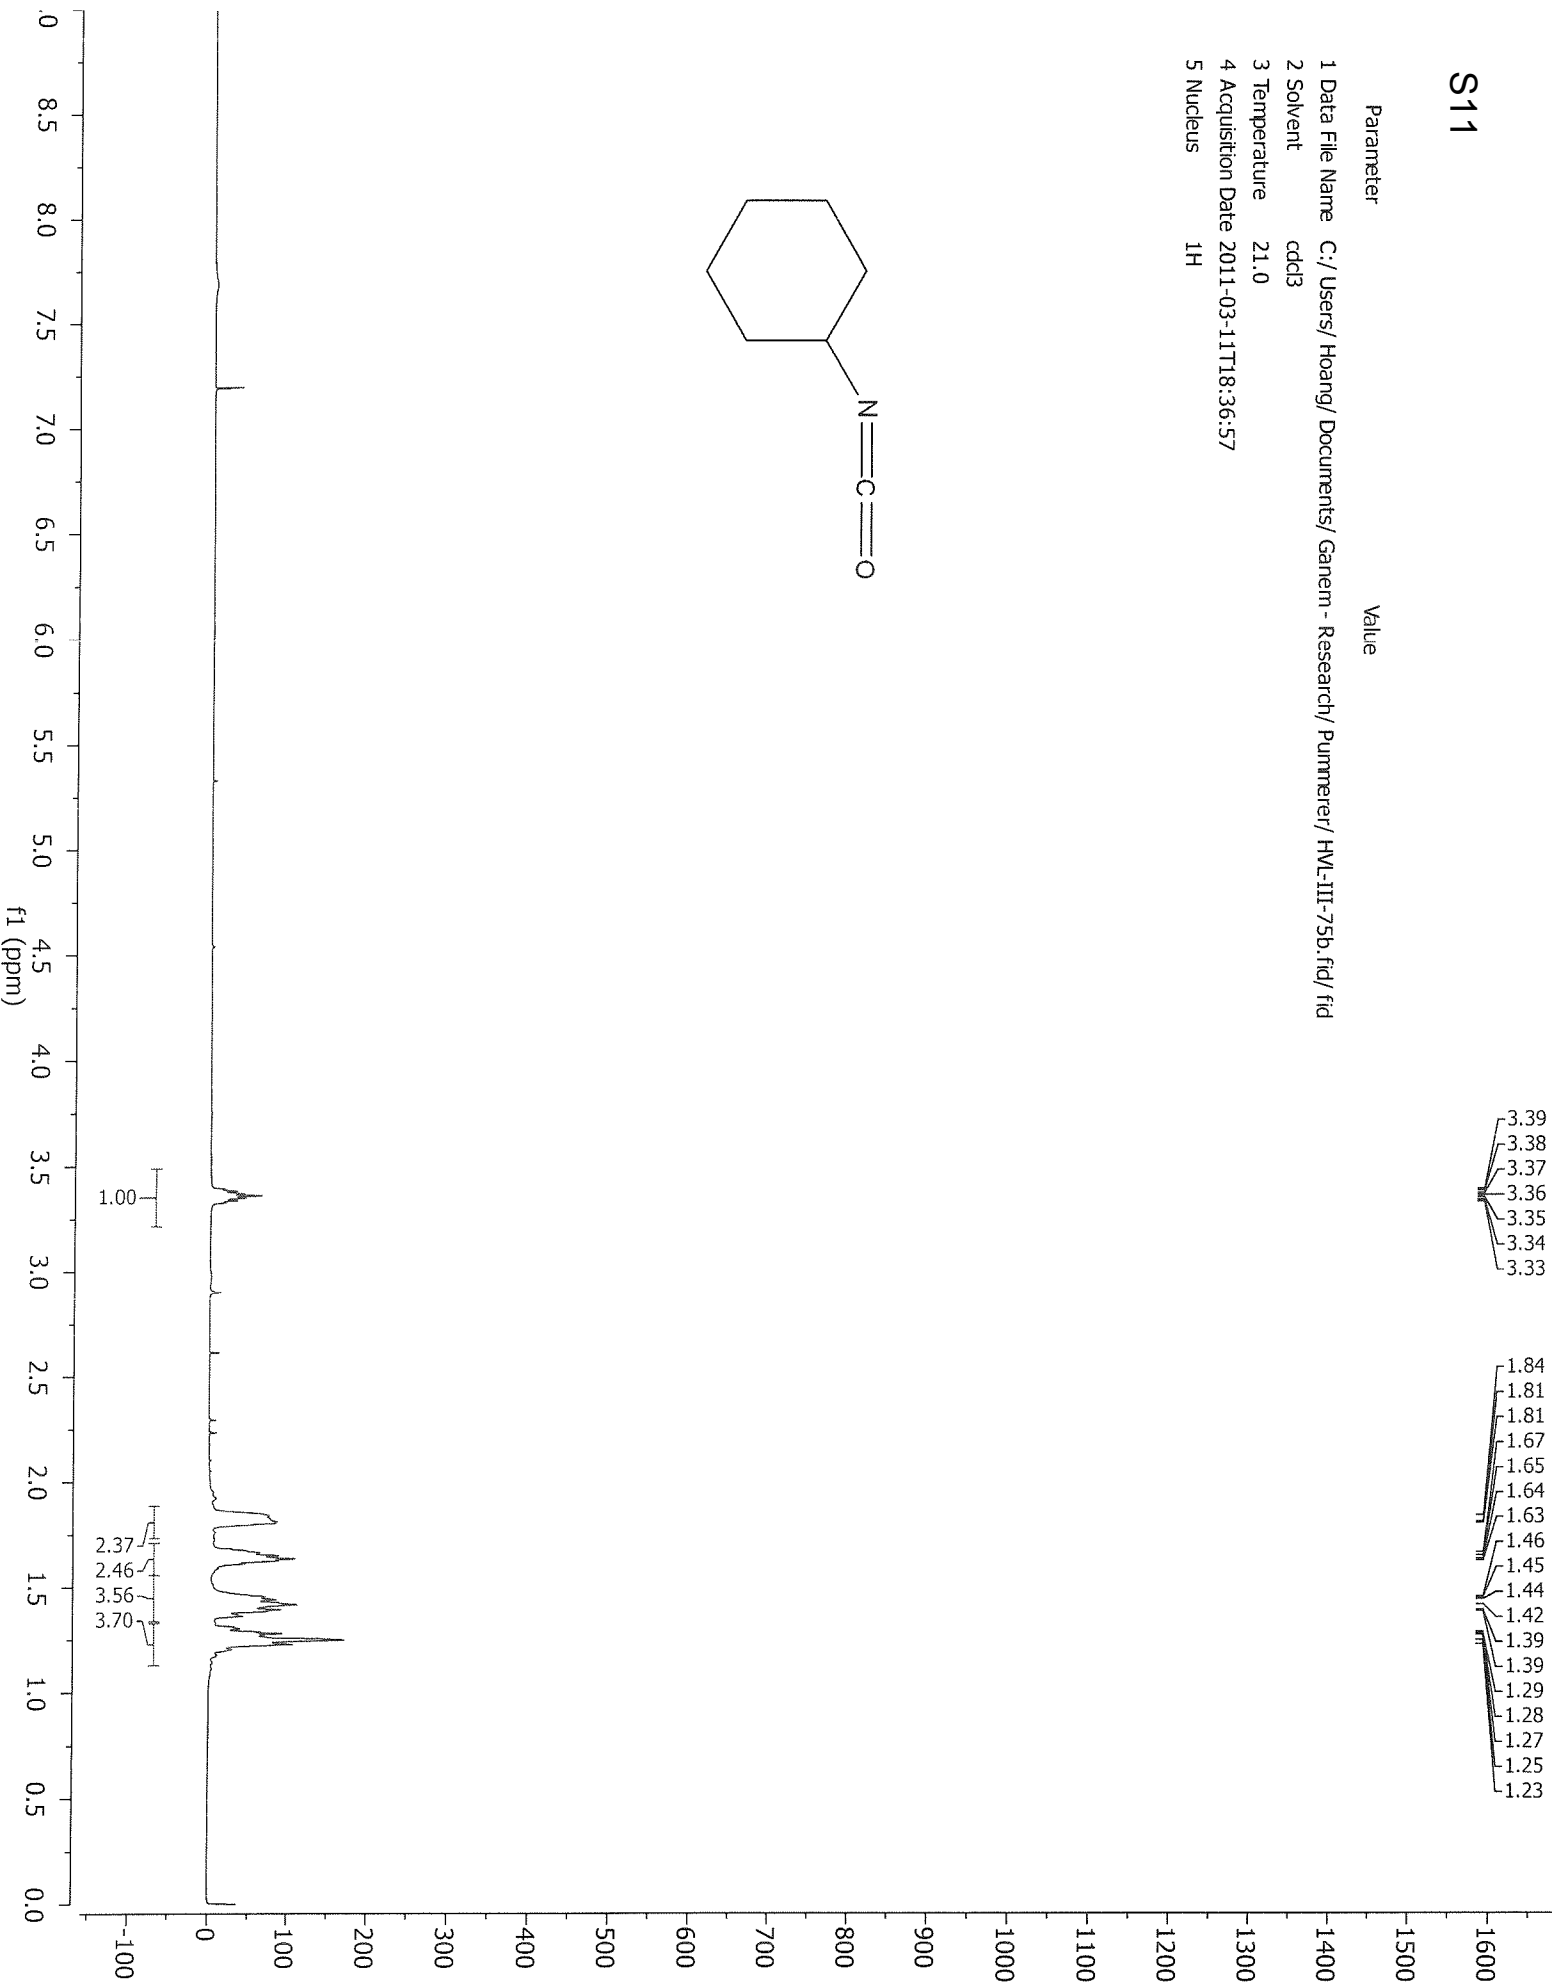

S12

122.29

53.31

34.74

25.17

23.75

| Parameter          | Value                                                                      |
|--------------------|----------------------------------------------------------------------------|
| 1 Data File Name   | C:/Users/Hoang/Documents/Ganem - Research/Pummerer/HVL-III-75b-C13.fid/fid |
| 2 Solvent          | cdcl3                                                                      |
| 3 Temperature      | 21.0                                                                       |
| 4 Acquisition Date | 2011-03-14T10:44:38                                                        |
| 5 Nucleus          | <sup>13</sup> C                                                            |

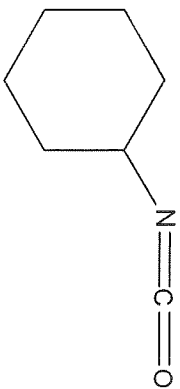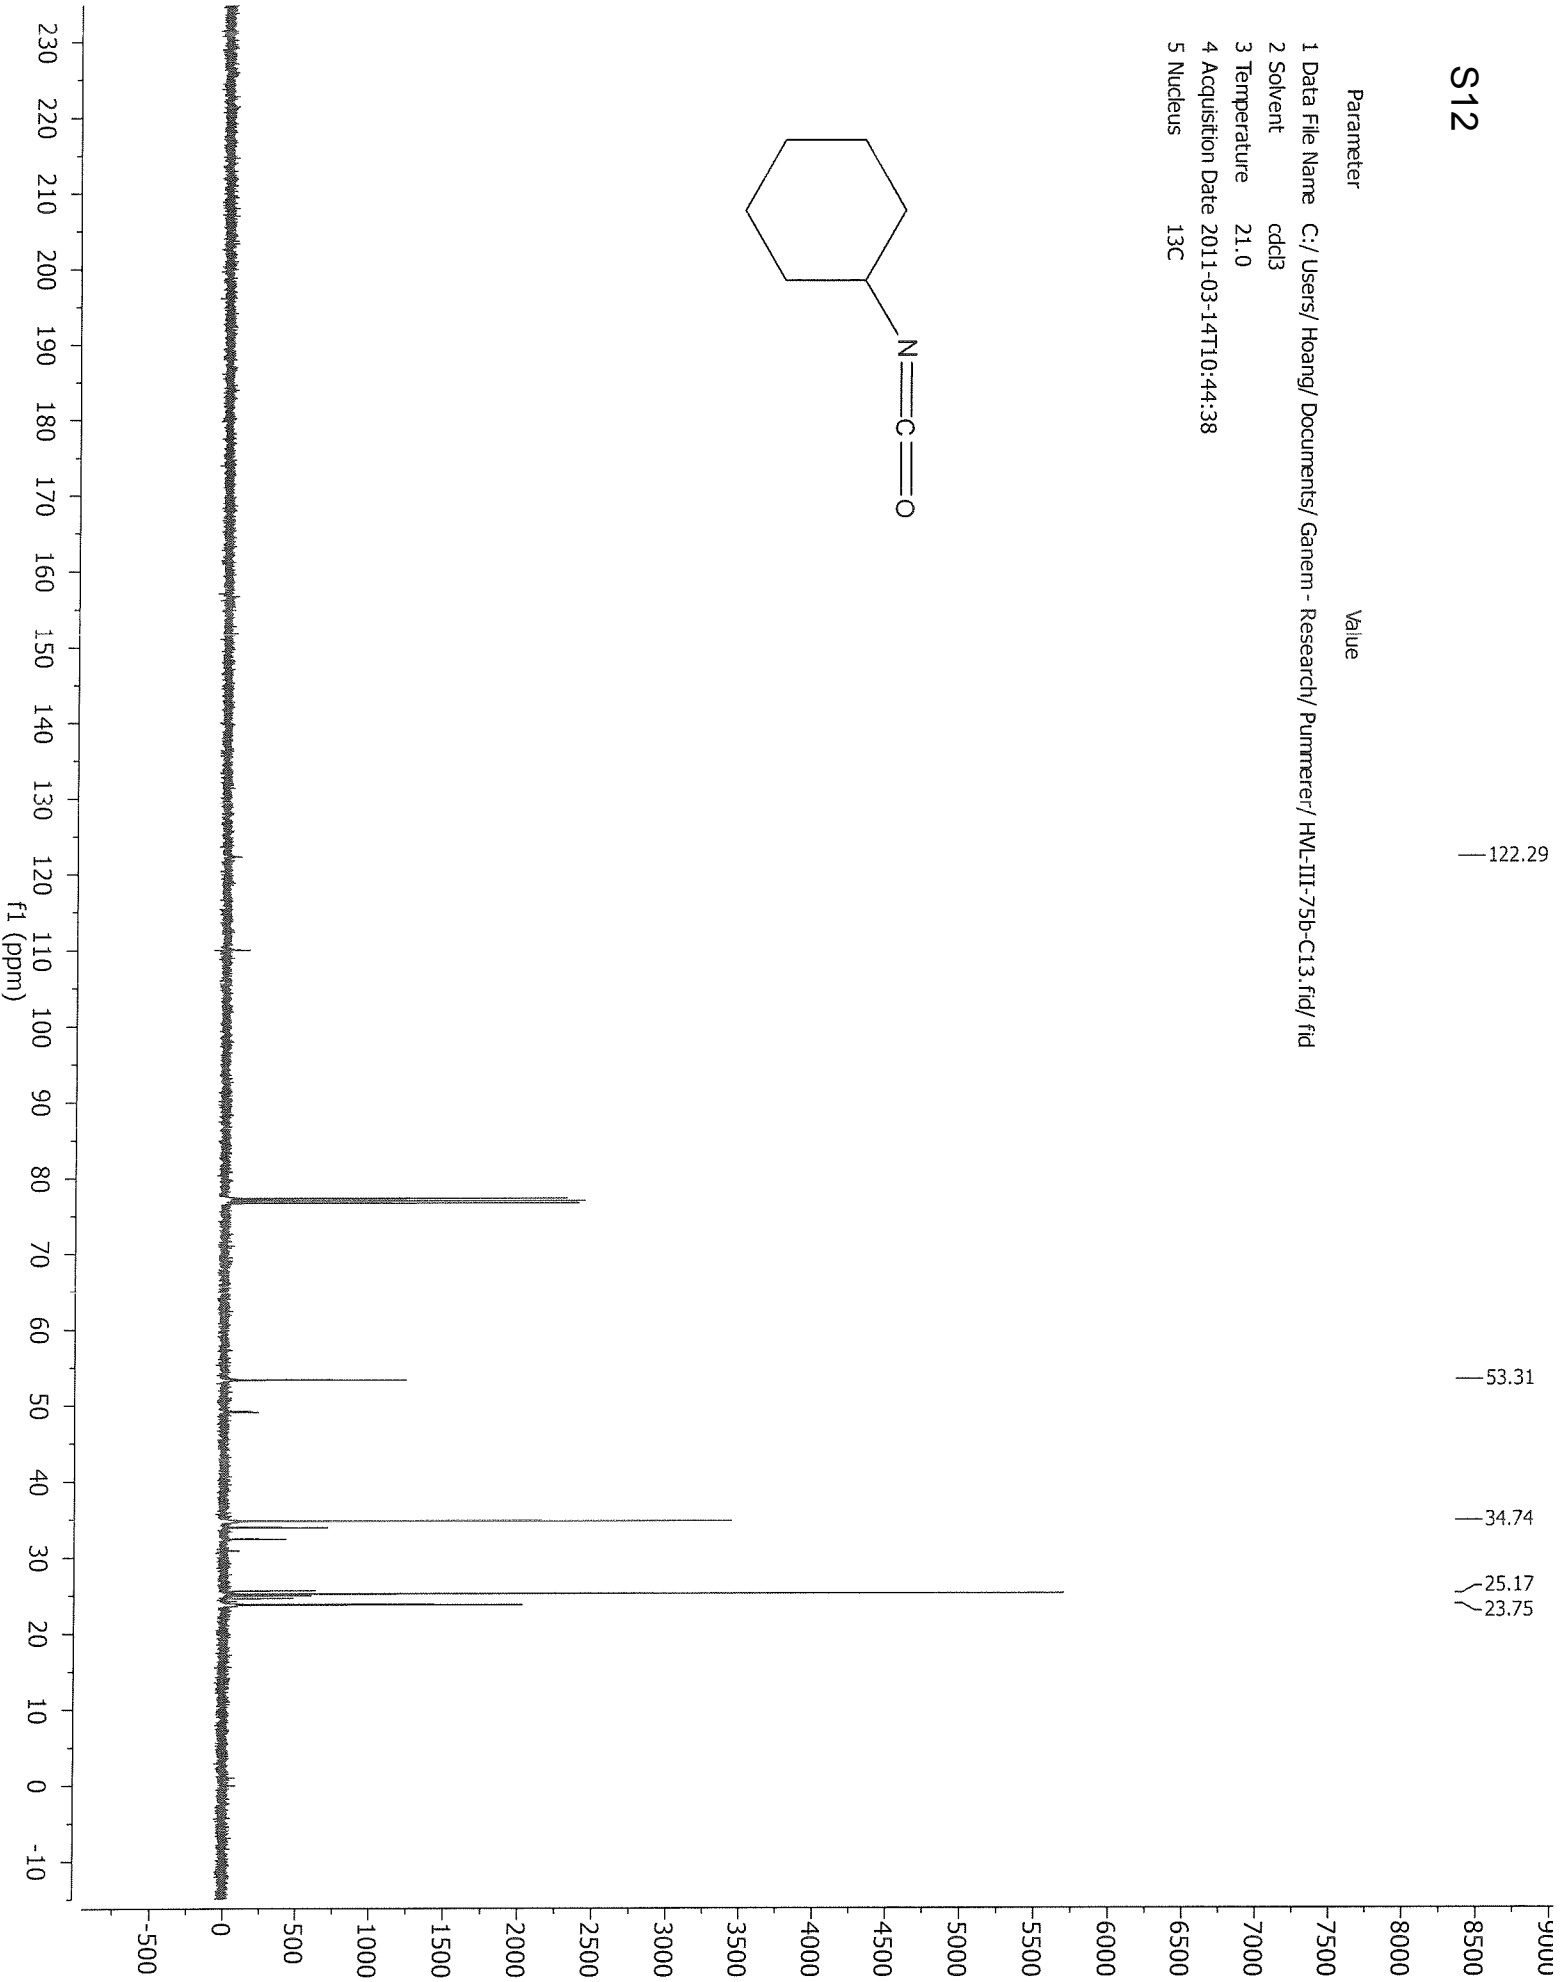

# S13

Parameter Value  
1 Data File Name C:/Users/Hoang/Documents/Ganem - Research/Pumrerer/HVL-III-59e.fid/fid  
2 Solvent cdd3  
3 Temperature 21.0  
4 Acquisition Date 2011-02-28T18:33:04  
5 Nucleus <sup>1</sup>H

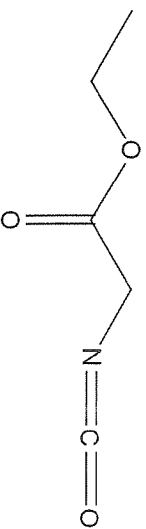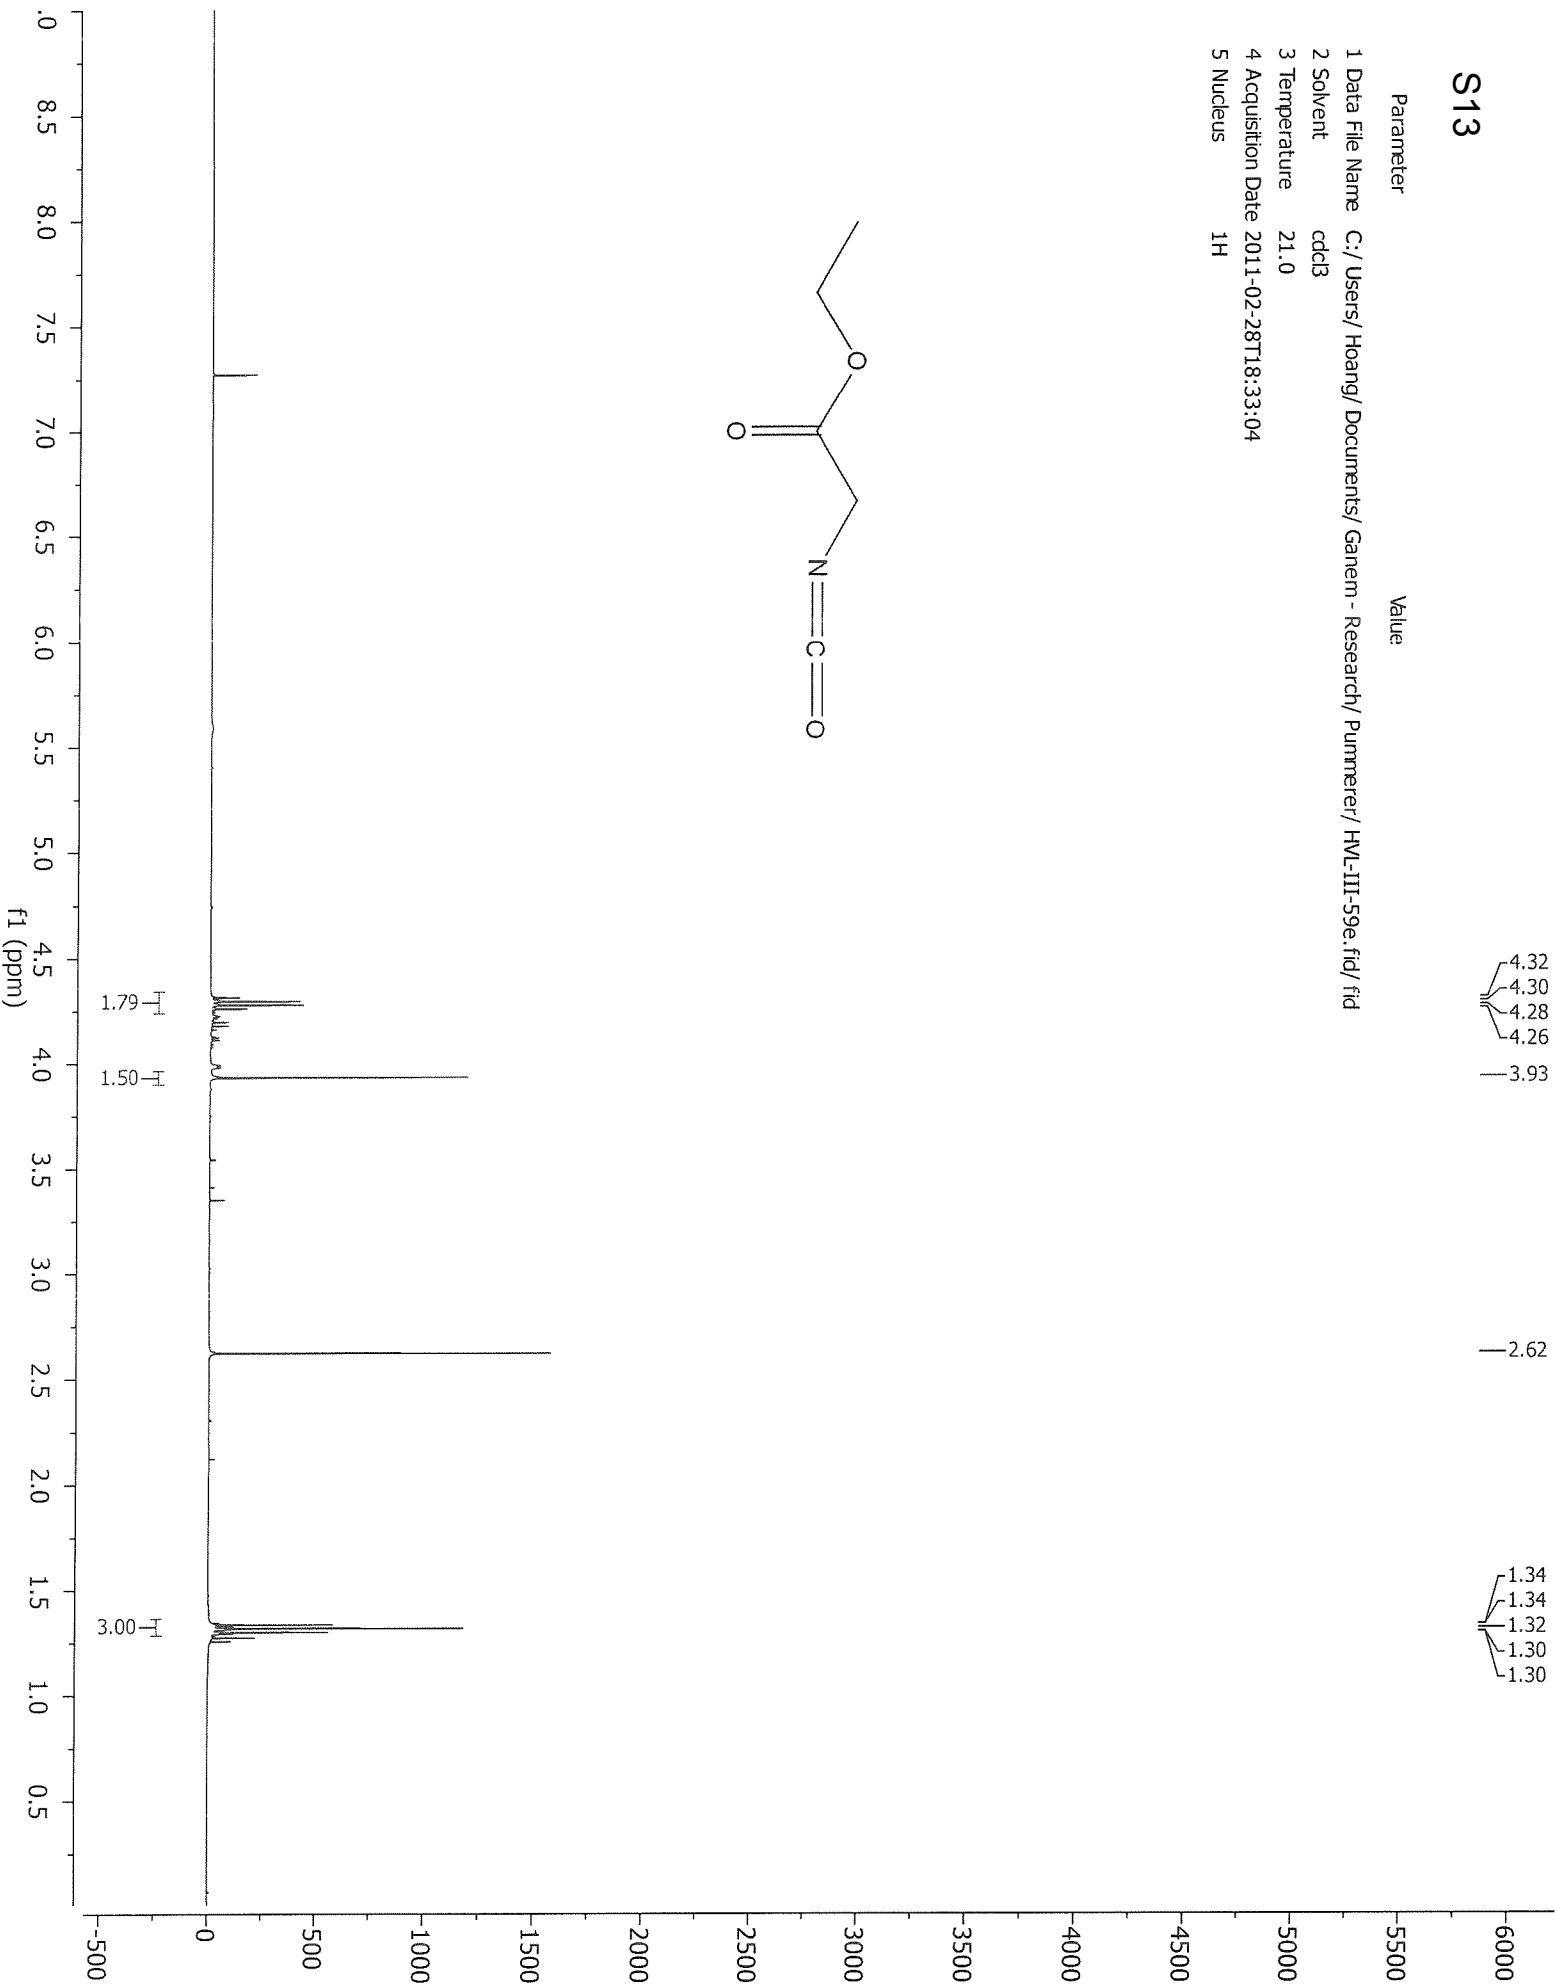

# S14

169.14

62.51

44.49  
40.94

14.09

Parameter

Value

- 1 Data File Name C:/Users/Hoang/Documents/Ganem - Research/Pumrerer/HVL-III-59e-C13.fid/fid
- 2 Solvent cdd3
- 3 Temperature 21.0
- 4 Acquisition Date 2011-02-28T19:05:34
- 5 Nucleus 13C

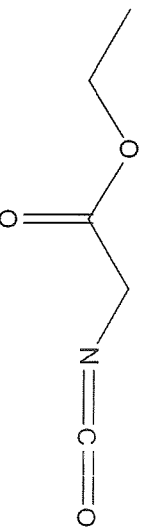

HMBC showed a signal at 127.43

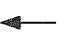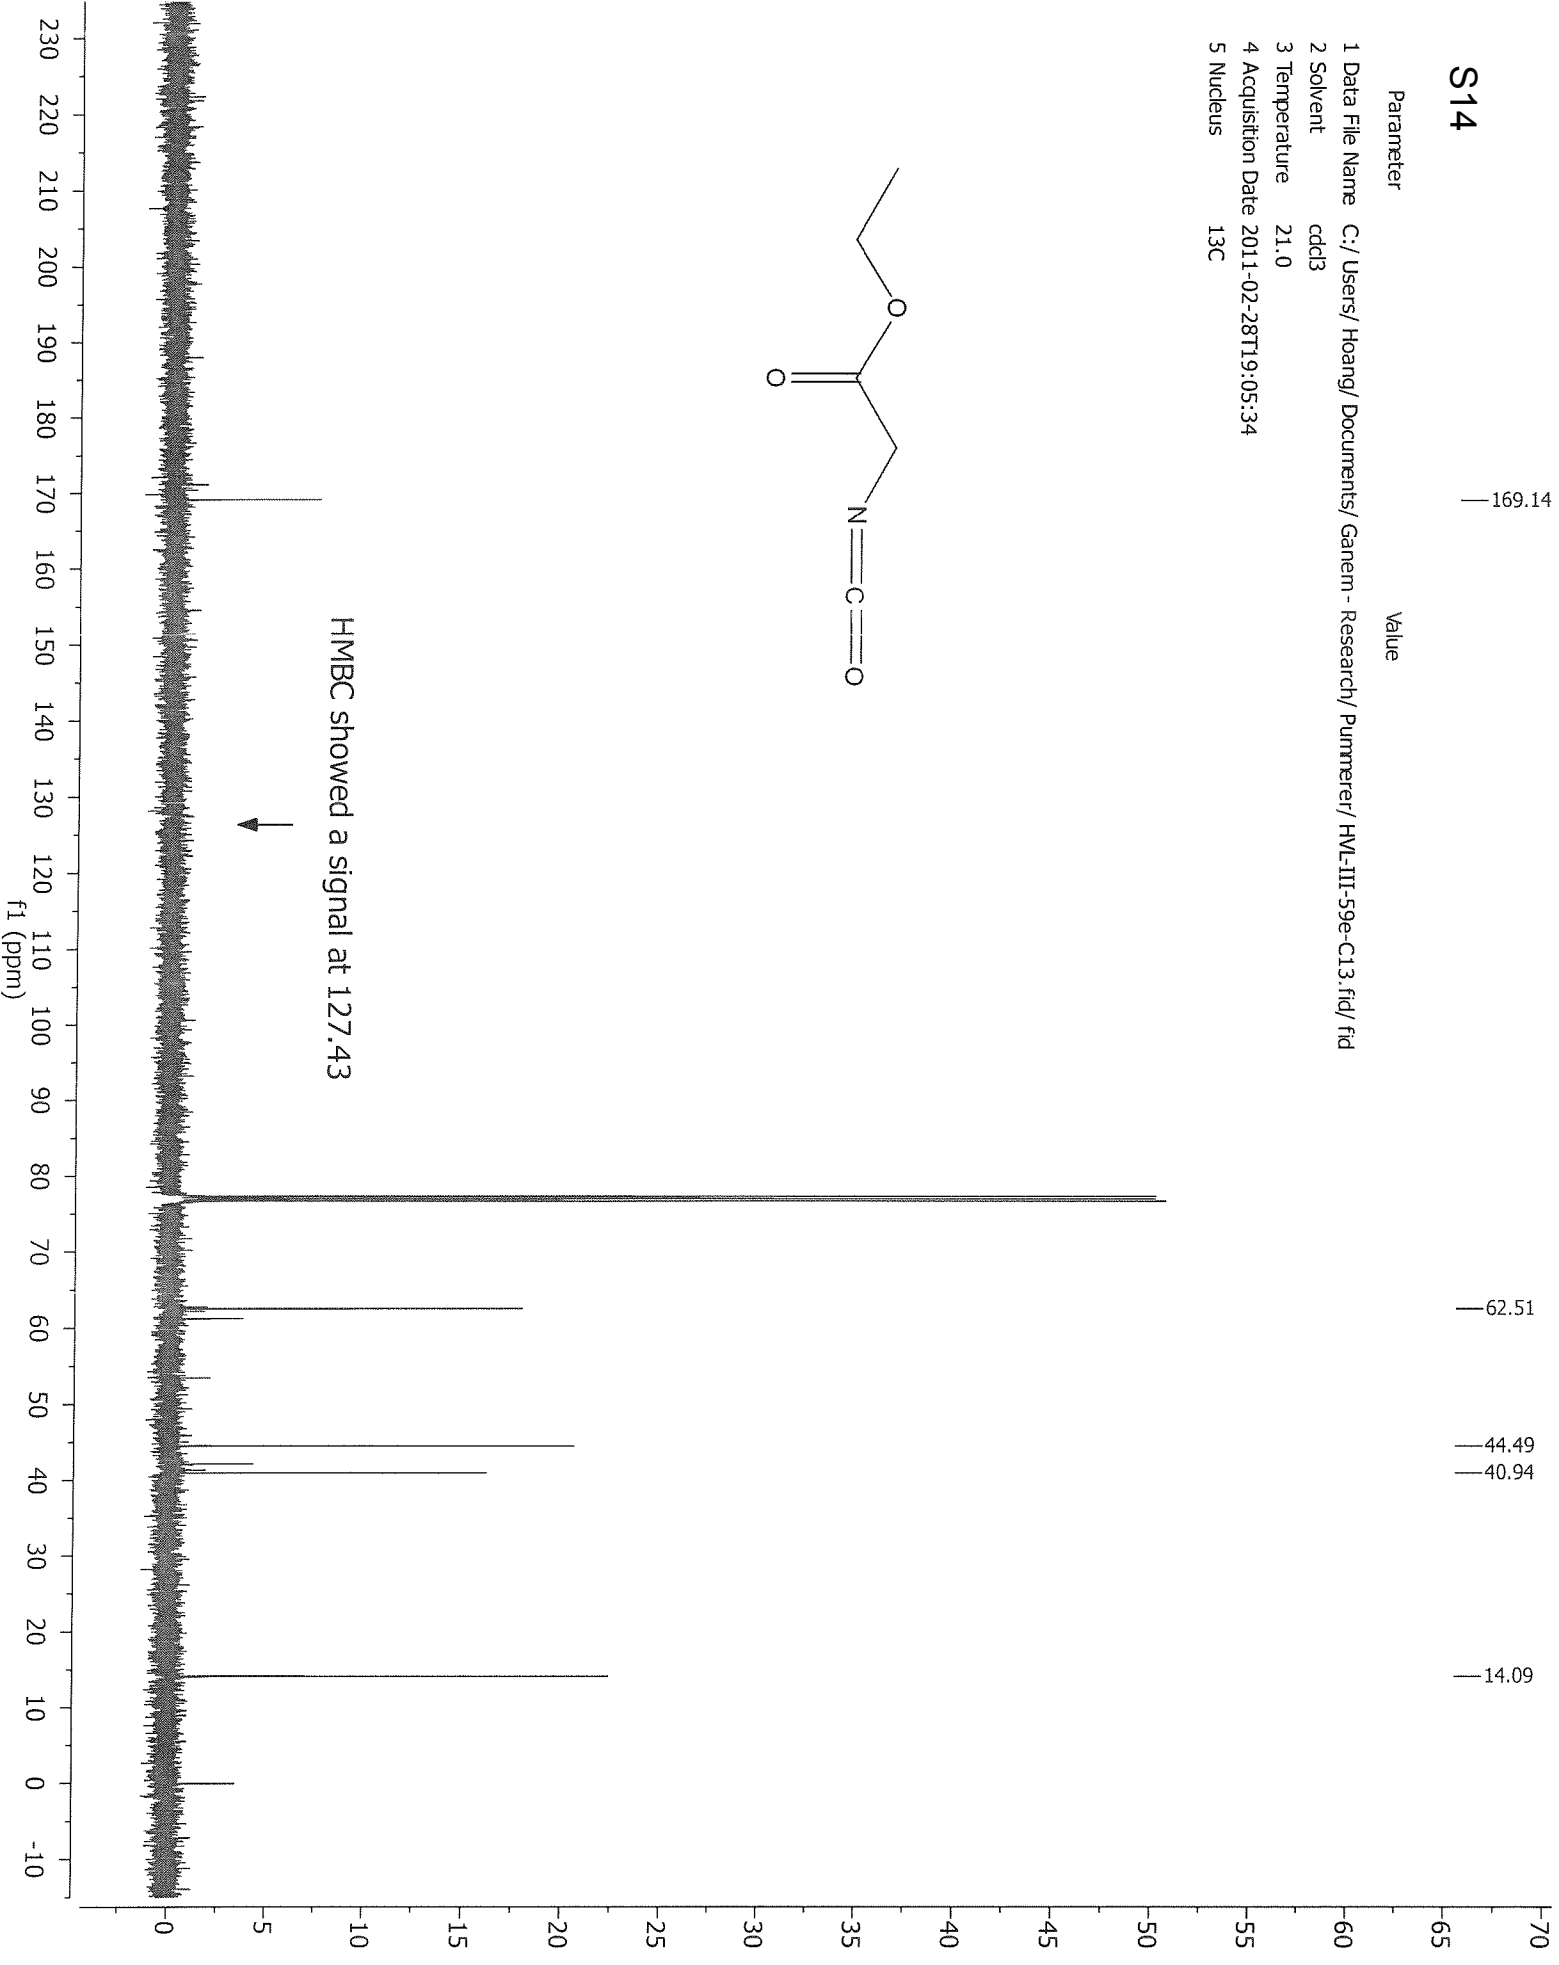

Supplement: NIHMS289754-supplement-1_si_001.pdf [file NIHMS289754-supplement-1_si_001.pdf]
